# Supplementary material
Source: Research Square preprint supplement (doi:10.21203/rs.3.rs-9640267/v1)
Supplement: Supplementary file 1 [file f3938e9d82c2e88ae40a61ca.docx]

**Supplementary material: “The industrialisation of the seabed: Estimating century-scale impacts of bottom trawling on shelf sea sediments”**

1. **Supplementary Tables**
2. **Supplementary Figures**
3. **Supplementary References**
4. **Supplementary Tables**

**Table S1: (A) Total number of bottom trawlers (1825–1916) and (B) total bottom trawling hours in 1925 used in Swept Area Ratio (SAR) calculations. Part (A) is presented by fleet associated region and Part (B) by ICES Fishing Regions. Hyphens (–) indicate missing data. Icelandic fleet data from 1895 and 1910 were combined with 1900 and 1916, respectively, to maintain temporal consistency with other regions. Superscript numerals indicate the literature source and correspond to the Supplementary Tables S1–S5 reference list provided below.**

| **(A)** |  |  |  |  |  |  |
| --- | --- | --- | --- | --- | --- | --- |
| **Fleet** | **Region** | **Year** | **Sail** | **Steam** | **Motor** | **Dredger** |
| **England and Wales** | Northeast | 1825 | 2 30 | 0 | 0 | 0 |
| 1850 | 32 30,32,38 | 0 | 0 | 0 |
| 1875 | 904 2,3,15,32,38 | 35 32 | 0 | 0 |
| 1900 | 367 12,15,16,32,38 | 753 12,16,32,38 | 5 31 | 0 |
| South | 1825 | 235 15,18,36,37 | 0 | 0 | 29 37 |
|  | 1850 | 339 30, 37 | 0 | 0 | 323 37 |
|  | 1875 | 272 1, 15,30 | 1 32 | 0 | 323 30 |
|  | 1900 | 423 12,32,38 | 13 12,38 | 7 31 | 323 30 |
| Southeast | 1825 | 160 30, 37 | 0 | 0 | 0 |
|  | 1850 | 222 30, 37 | 0 | 0 | 0 |
|  | 1875 | 609 15,30,32,38 | 0 | 0 | 0 |
|  | 1900 | 960 12,16,32,38 | 11 16 | 8 31 | 18 31 |
| West | 1825 | 61 4,30 | 0 | 0 | 0 |
|  | 1850 | 88 4,30 | 0 | 0 | 0 |
|  | 1875 | 108 15,30 | 0 | 0 | 0 |
|  | 1900 | 151 12,14,38 | 76 12,14 | 1 31 | 0 |
| Eng. & Wal. | 1916 | 453 25 | 231 25 | 33 25 | - |
| **Distant Water** | Iceland / Faroe | 1895 (1990) | 0 | 20 39 | 0 | 0 |
| 1910 (1916) | 0 | 151 39 | 0 | 0 |
| **Scotland** | Scotland | 1825 | 15 4 | 0 | 0 | 3 4 |
|  | 1850 | 27 32 | 0 | 0 | 0 |
|  | 1875 | 36 32 | 1 | 0 | 0 |
|  | 1900 | 97 12,32,38 | 173 12,32,38 | 13 9 | 4 9 |
|  | 1916 | 34 9 | 90 9 | 0 | - |
| **Ireland** | Connacht | 1825 | 0 | 0 | 0 | 10 4 |
|  | 1850 | 11 4,30 | 0 | 0 | 99 4 |
|  | 1875 | 22 10,15,30 | 0 | 0 | 159 4 |
|  | 1900 | 117 17,29,38 | 10 17,38 | 8 34 | 159 4 |
| Leinster | 1825 | 35 4 | 0 | 0 | 150 4,11 |
|  | 1850 | 45 4 | 0 | 0 | 150 4,11 |
|  | 1875 | 70 10,15,30 | 0 | 0 | 150 4,11 |
|  | 1900 | 116 17,29 | 4 17 | 10 34 | 150 4,11 |
| Munster | 1825 | 38 4,27 | 0 | 0 | 125 4 |
|  | 1850 | 60 4 | 0 | 0 | 400 4 |
|  | 1875 | 172 4,10,15,29,30 | 3 10 | 0 | 400 4 |
|  | 1900 | 72 17,29 | 2 17,29 | 1 34 | 400 4 |
| Ulster | 1825 | 14 4 | 0 | 0 | 140 4 |
|  | 1850 | 38 4 | 0 | 0 | 227 4 |
|  | 1875 | 50 10,15 | 0 | 0 | 227 4 |
|  | 1900 | 151 17,29 | 1 17 | 7 34 | 227 4 |
| Ireland | 1916 | 311 35 | 12 35 | 15 35 | - |
|  | | | | | | |
| (B) **Total fishing hours by British first-class bottom trawlers** 25 | | | | | | |
|  | | **Year** | **Sail** | **Steam** | **Motor** | **Dredger** |
| Bristol Channel (VII f) | | 1925 | 7,469 | 38,967 | 1,321 | - |
| English Channel (Vii d / e) | | 1925 | 124,130 | 32,610 | 23,898 | - |
| Faroe (V b) | | 1925 | 0 | 181,901 | 0 | - |
| Iceland (V a) | | 1925 | 0 | 209,192 | 0 | - |
| Irish Sea (VII a) | | 1925 | 7,981 | 156,598 | 7,756 | - |
| North Sea (IV) | | 1925 | 390,669 | 1,950,881 | 17,977 | - |
| Rockall (VI b) | | 1925 | 0 | 3,814 | 0 | - |
| South of Ireland (VII g / k) | | 1925 | 5,586 | 334,388 | 0 | - |
| West of Ireland (VII b / c) | | 1925 | 0 | 99,508 | 0 | - |
| West of Scotland (VI a) | | 1925 | 0 | 213,556 | 0 | - |
| Note: Data represents fishing hours for British first-class vessels in 1925 25. To account for the Irish fleet, British effort was scaled using the 1925 ratio of total Irish to British trawlers 35. | | | | | | |

**Table S2: Gear and effort parameters used in Swept Area Ratio (SAR) calculations by trawler type and fleet (1825–1925). Values provided are based on representative observations from historical records. For 1925, effort was calculated using total fishing hours rather than fishing days and tow parameters. Beam width is defined as the width of the wooden beam, while otter trawl width refers to distance between doors. Superscript numerals indicate the literature source and correspond to the Supplementary Tables S1–S5 reference list provided below.**

| **Vessel Type** | **Fleet** | **Period** | **Beam Width (m)** | **Otter trawl width (m)** | **Fishing Days** | **Tows (day-1)** | **Tow Duration (h)** | **Tow Speed (km/h)** |
| --- | --- | --- | --- | --- | --- | --- | --- | --- |
| **Sail** | Eng. & Wal. | 1825 - 1850 | 8.7 37,38 | - | 214 37 | 1.8 15,22,38 | 4.8 30,38 | 2.8 32 |
| 1875 | 8.7 37,38 | - | 233 15,30 | 1.8 15,22,38 | 4.8 30,38 | 2.8 32 |
| 1900 - 1916 | 13.3 32,38 | 26.2 6,21 | 235 32,38 | 1.8 15,22,38 | 4.8 30,38 | 2.8 32 |
| 1925 |  | 26.2 6,21 | - | - | - | 2.8 32 |
| Scotland | 1825 - 1916 | 13.3 * | 26.2 * | 223 32 | 1.8 * | 4.8 * | 2.8 32 |
| 1925 | - | 26.2 * | - | - | - | 2.8 32 |
| Ireland | <1850 | 10.1 4,30 | - | 228 4 | 1.8 * | 4.8 * | 2.8 * |
| 1850 - 1916 | 10.9 15 | 26.2 * | 228 4 | 1.8 * | 4.8 * | 2.8 * |
| 1925 | - | 26.2 * | - | - | - | 2.8 * |
| **Steam** | Eng. & Wal. | 1875 - 1916 | 15.5 32 | 26.2 6,21 | 235 * | 3 38 | 5 38 | 3.7 24 |
| 1925 | - | 26.2 6,21 | - | - | - | 3.7 24 |
| Scotland | 1875 - 1916 | 14.1 32 | 26.2 * | 223 * | 3 * | 5 * | 3.7 * |
| Eng. & Wal. | 1925 | - | 26.2 6,21 | - | - | - | 3.7 24 |
| Ireland | 1875 - 1916 | 15.5 * | 26.2 * | 228 * | 3 * | 5 * | 3.7 * |
| Eng. & Wal. | 1925 | - | 26.2 6,21 | - | - | - | 3.7 24 |
| Iceland | 1900 - 1916 | 15.5 * | 26.2 * | 196 39 | 3 * | 5 * | 3.7 * |
| Eng. & Wal. | 1925 | - | 26.2 6,21 | - | - | - | 3.7 * |
| **Motor** | All Regions | 1916 | - | 26.2 * | 229 * | 3 * | 5 * | 4.6 21,23 |
| 1925 | - | 26.2 * | - | - | - | 4.6 * |
| **Dredger** | Eng. & Wal. | 1825 - 1900 | 2.4 * | - | 193 30 | 1.8 * | 4.8 * | 2.8 * |
| Scotland | 1825 - 1900 | 2.4 * | - | 200 * | 1.8 * | 4.8 * | 2.8 * |
| Ireland | 1825 - 1900 | 2.4 4 | - | 205 4 | 1.8 * | 4.8 * | 2.8 * |
| ***** assumed based on similar data | | | | | | | | |

**Table S3. Historical beam trawl gear dimensions and estimated hydrodynamic drag for the period 1825 - 1925. Hydrodynamic drag was calculated by summing contributions from the beam, shoes, netting, warp, and ground rope, with component surfaces scaled from beam width. Historical beam trawls used only a ground rope, lacking the tickler chains characteristic of modern gear. Values are reported as total drag (kN) and normalized per meter of trawl width (N/m). The final row shows the mean and range across the four vessel types. Superscript numerals indicate the literature source and correspond to the Supplementary Tables S1–S5 reference list provided below.**

| **Parameter (m)** | **Beam trawler type** | | | |
| --- | --- | --- | --- | --- |
| *Smack* 3 | *Schokker* 8 | *Schuit* 41 | *Bomschuit* 26 |
| Vessel length | 24 | 12.2 | 13.7 | 12.2 |
| Beam trawl | 14 | 8 | 8.6 | 8 |
| Diameter beam | 0.20 | - | 0.15 | - |
| Trawl head (2x) | 1.22 | 0.8 | 0.9 | - |
| Foot rope | 29.9 | 10-12 | 10.3 | - |
| Head rope diameter | 0.06 | 0.06 | - | - |
| Net length | 25.6 | 12 | 15.3 | - |
| Mesh size | 0.076 – 0.20 | 0.07 – 0.05 | - | - |
| Cod-end length | 3.65 | 2 | 5.1 | - |
| Cod-end mesh | 0.076 | 0.05 | - | - |
| Netting | 31.7 | 7.0 | 13.4 | - |
| **Unit** | **Overall gear hydrodynamic drag** | | | |
| kN | 5.19 | 2.18 | 2.26 | 1.76 |
| N/m | 317 | 272 | 262 | 219 |
| Mean N/m [range] | 268 [219-317] | | | |

**Table S4. Historical otter trawl gear dimensions and hydrodynamic drag estimates for associated components. Hydrodynamic drag per meter of dredge width (N/m) was calculated by summing contributions from doors and ground gear. Values were based on reported ranges of historic gear in relevant years. In some cases, values were scaled to reflect the emergence and rapid evolvement of fishing gears (e.g. Rijnsdorp et al., 2008) around the turn of the 20th century and are reported as total and range values for the periods indicate. In addition to the sources listed in the table, other literature consulted included Cunningham, (1895) and Kerby et al., (2012). Superscript numerals indicate the literature source and correspond to the Supplementary Tables S1–S5 reference list provided below.**

| **Trawler type (gear)** | **Year** | **Door length (m)** | **Door height (m)** | **Ground gear length (m)** | **Towing speed (km/h)** | **Overall hydrodynamic drag (N/m)*** |
| --- | --- | --- | --- | --- | --- | --- |
| Steam (otter) | 1875 | 2.5 7 | 1.3 7 | 38 7 | 2.88 21 | 420 [399-441] |
| 1900 | 2.5 7 | 1.3 7 | 38 7 | 3.24 † | 512 [486-537] |
| 1916 | 3.35 13 | 1.4 13 | 42 13 | 3.6 † | 701 [666-736] |
| 1925 | 3.35 13 | 1.4 13 | 42 13 | 3.96 † | 821 [780-862] |
| Motor (otter) | 1900 | 2.5 7 | 1.3 7 | 38 7 | 3.96 † | 713 [677-749] |
| 1916 | 3.35 13 | 1.4 13 | 42 13 | 4.32 † | 948 [901-996] |
| 1925 | 3.35 13 | 1.4 13 | 42 13 | 4.68 21, 23 | 1081 [1027-1135] |
| *Otter boards were assumed to have a 20° attack angle 7, ground gear was modelled as a continuous 8 cm rope, and netting was parameterized with 85 mm mesh size, 4 mm twine thickness, and a 22.5° mesh opening angle 13. Otter trawls used within the study timeline lacked sweeps, the extended cables between the otter boards and the net used to herd fish, and were thus not considered in the drag area.  † Scaled based on available data | | | | | | |

**Table S5. Penetration depths, silt fractions, and sediment porosity parameters used in sediment mobilisation estimates. As historical beam trawls used only a ground rope, lacking the tickler chains characteristic of modern gear, penetration depth was assumed to be analogous to that of an otter trawl given the similarity of ground rope. Superscript numerals indicate the literature source and correspond to the Supplementary Tables S1–S5 reference list provided below.**

| **Sediment** | **Penetration depth (cm)** | | | **Silt frac (%)** | **Sed. Por [mean ± SD]** |
| --- | --- | --- | --- | --- | --- |
| **OT** | **BT** | **DR** |
| **Mud** | 0.3 – 5.3 28 | 0.3 – 5.3 * | 1.7 – 13.9 28 | 30-80 40 | 0.8 ± 0.05 20 |
| **Sand** | 0.0 - 3.7 28 | 0.0 - 3.7 * | 1.2 – 8.3 28 | 5-30 40 | 0.4 ± 0.05 20 |
| **Gravel** | 0.2 – 5.8 28 | 0.2 – 5.8 * | 1.7 – 13.7 28 | 1-5 40 | 0.3 ± 0.05 * |
| ***** assumed based on similar data | | | | | |

**Supplementary Tables S1 – S5 References:**

1. Alward, G. L. (1932) The sea fisheries of Great Britain and Ireland: A record of the development of the fishing industry and its world-wide ramifications. Grimsby: Albert Gait.
2. Ansell, A.W. (1883) On Trawling (No. 12). W. Clowes and Sons, Limited.
3. Collins, J. W. (1889) The beam-trawl fishery of Great Britain: With notes on beam-trawling in other European countries. US Government Printing Office.
4. Commissioners of Inquiry (1836) First Report of the Commissioners of Inquiry into the state of the Irish Fisheries, with the Minutes of Evidence and Appendix. Alexander Thom & Co., Dublin.
5. Cunningham, J.T. (1895) North Sea investigations. Journal of the Marine Biological Association of the United Kingdom, 4(1), pp.10-47.
6. Cunningham, J.T. (1896) Observations at Sea and in the Markets. Journal of the Marine Biological Association of the United Kingdom, 4(2), 108-112. doi:10.1017/S0025315400060331.
7. Currie, J.C., Sink, K.J., Attwood, C.G., Atkinson, L.J., & Engelhard, G.H. (2019) Reconstructing the past: design and function of Granton otter trawl gear at the turn of the twentieth century, as used in South Africa’s first trawl surveys (1897–1904). Maritime Studies 18:1-16.
8. de Veen, J. (2024) De trawlvisserij en haar ontwikkeling. Een ongepubliceerd manuscript geschreven in de periode 1941-1945. Wageningen Marine Research, Wageningen Marine Research rapport 24.003. 114 pp.
9. Fishery Board for Scotland (1922) Sea fisheries statistical tables. H.M. Stationery Office, Edinburgh.
10. Fishery Commissioners (1865) Report of the Deep Sea and Coast Fishery Commissioners Ireland for 1864 to His Excellency the Lord Lieutenant of Ireland. Alexander Thom & Co., Dublin.
11. Fraser, R. (1818) A review of the domestic fisheries of Great Britain and Ireland.
12. Garstang, W. (1900) The impoverishment of the sea. Journal of the Marine Biological Association of the United Kingdom, 6, 1–69.
13. Gibbs, W.E. (1922) The fishing industry. Sir I. Pitman & sons, Limited.
14. Herdman, W.A. & Dawson, R.A. (1902) Fishes and fisheries of the Irish Sea: And especially of the Lancashire and western sea-fisheries district (No. 2). George Philip & Son.
15. Holdsworth, E. W. H. (1874) Deep-sea fishing and fishing boats. E. Stanford, London.
16. Holt, E. W. (1895) An examination of the present state of the Grimsby trawl fishery, with especial reference to the destruction of immature fish. Journal of the Marine Biological Association of the United Kingdom, 3(5), 339–446.
17. Inspectors of Irish Fisheries (1892) Report of the Inspector of Irish Fisheries on the Sea and Inland Fisheries of Ireland for 1891. Alexander Thom & Co., Dublin.
18. Jones, P. (2018) The spread of bottom trawling in the British Isles, c. 1700–1860. International Journal of Maritime History, 30(4), 681–700.
19. Kerby, T.K., Cheung, W.W., & Engelhard, G.H. (2012) The United Kingdom’s role in North Sea demersal fisheries: a hundred year perspective. Reviews in Fish Biology and Fisheries, 22(3), pp.621-634.
20. Khedri, P., Gourgue, O., Depestele, J., Arndt, S., & van de Velde, S.J. (2025) Reconciling the impact of mobile bottom-contact fishing on marine organic carbon sequestration. ICES journal of marine science, 82(9), p.fsaf154.
21. Kyle, H.M. (1903) Fishing nets, with special reference to the otter-trawl. Journal of the Marine Biological Association of the United Kingdom, 6(4), pp.562-586.
22. March, E.J. (1953) Sailing trawlers. The story of deep-sea fishing with long line and trawl. Percival Marshall and Company Ltd, London.
23. Masterman, A. T. (1914) Report on the plaice fisheries of the North Sea (Parts I and II). Fishery Investigations, Series II, Vol II:120.
24. Meek, Alexander (1901) Report on the Scientific Investigations for the year 1901. Northumberland Sea Fisheries Committee.
25. Sea Fisheries (1925). Sea fisheries statistical tables 1925. Fisheries – England & Wales. Ministry of Agriculture, Fisheries and Food. H.M. Stationery Office, London.
26. Petrejus, E.W. (1954) De bomschuit, een verdwenen scheepstype. Publicaties van het Museum van Land- en Volkenkunde en het Maritiem Museum "Prins Hendrik" Book 1954. No 2. M.M.1, Rotterdam.
27. Walsh, J., XLVI. (1774). Of torpedos found on the Coast of England. In a letter from John Walsh, Esq; FRS to Thomas Pennant, Esq; FR S. Philosophical Transactions of the Royal Society of London, (64), pp.464-473.
28. Pitcher, C.R., Hiddink, J.G., Jennings, S., Collie, J., Parma, A.M., Amoroso, R., Mazor, T., Sciberras, M., McConnaughey, R.A., Rijnsdorp, A.D., & Kaiser, M.J. (2022) Trawl impacts on the relative status of biotic communities of seabed sedimentary habitats in 24 regions worldwide. Proceedings of the National Academy of Sciences, 119(2), p.e2109449119.
29. Report on Fish Decreases (1889) Report on Inquired held by the Inspectors of Irish Fisheries into an Alleged Decrease in the Supply of Fish off Certain Parts of the Coast of Ireland and the Alleged Effects Thereon by Trawling and Other Modes of Fishing to His Excellency the Lord Lieutenant of Ireland. Alexander Thom & Co., Dublin.
30. Report on Sea Fisheries (1866) Report from the Commissioners Appointed to Enquire into the Sea Fisheries of the United Kingdom with Appendix and Minutes of Evidence. Eyre and Spottiswoode, London.
31. Report on Sea Fisheries (1914) Annual report on sea fisheries for the year 1914 Part I and II. H.M. Stationery Office, London.
32. Report on Trawl Net and Beam Trawl Fishing (1885) Report of the Commissioners Appointed to Inquire and Report upon … the use of the Trawl Net and Beam Trawl, with Minutes of Evidence and Appendix. Eyre and Spottiswoode, London.
33. Rijnsdorp, A.D., Poos, J.J., Quirijns, F.J., HilleRisLambers, R., De Wilde, J.W., & Den Heijer, W.M. (2008) The arms race between fishers. Journal of sea Research, 60(1-2), pp.126-138.
34. Sea and Inland Fisheries of Ireland (1908) Report on the sea and inland fisheries of Ireland and appendix. The Stationery Office, Dublin.
35. Sea and Inland Fisheries of Ireland (1919) Report on the sea and inland fisheries of Ireland and appendix. The Stationery Office, Dublin.
36. Select Committee (1817) Report from Select Committee on South Devon Fisheries, with the Minutes of Evidence taken before them, 1817. Parliamentary Papers Online.
37. Select Committee (1833) Report from the Select Committee on British Channel Fisheries, with Minutes of Evidence and Appendix, 1833. Parliamentary Papers Online.
38. Select Committee (1893) Report from the Select Committee on Sea Fisheries, together with Proceedings of the Committee, Minutes of Evidence, Appendix and Index. Eyre and Spottiswoode, London.
39. Thor, J.T. (1992) British trawlers in Icelandic waters: History of British steam trawling off Iceland 1889-1916 and the Anglo-Icelandic fisheries dispute 1896-1897.
40. van der Reijden, K.J., Eigaard, O.R., Bastardie, F., van Denderen, P.D. and O’Neill, F.G., (2025). A gear component approach to trawling impact and sediment mobilization assessments. ICES Journal of Marine Science, 82(7), p.fsaf106
41. Venema, G.A. (1869) De visscherij in de provincie Groningen. In: Bijdragen tot de kennis van den tegenwoordigen staat der provincie Groningen. Gebr. Hoitsema, Groningen: 83-271.

**Table S6. Pre-1900 mapped trawling grounds with associated number shown in Figure S4.**

| **Number** | **Trawling ground** | **Number** | **Trawling ground** |
| --- | --- | --- | --- |
| 1 | Aberdeen Bay | 164 | Inchkeith (east) |
| 2 | Achill Head | 165 | India Bank |
| 3 | Achill Sound | 166 | Inner Dowsing |
| 4 | Adalvik | 167 | Inner Gabbard |
| 5 | Alward ground #1 | 168 | Ireland’s Eye |
| 6 | Alward ground #2 | 169 | Irish Sea grounds |
| 7 | Alward ground #3 | 170 | Isle of Man (west) |
| 8 | Alward ground #4 | 171 | Isle of May |
| 9 | Alward ground #5 | 172 | Johnshaven to Bervie |
| 10 | Alward ground #6 | 173 | Kenmare Bay |
| 11 | Alward ground #7 | 174 | Kentish Knock |
| 12 | Alward ground #8 | 175 | Kilcogan Bank |
| 13 | Alward ground #9 | 176 | Kilcummin Bay |
| 14 | Alward ground #10 | 177 | Kiliney Bay |
| 15 | Annalong ground | 178 | Killala Bay |
| 16 | Ardglass Bank | 179 | Killary Harbour |
| 17 | Ardmore | 180 | Kilmore |
| 18 | Arklow | 181 | Kinsale |
| 19 | Arnafjord 1 | 182 | Kinsale Harbour |
| 20 | Arnafjord 2 | 183 | Kish Bank 1 |
| 21 | Arnafjord (northwest) | 184 | Kish Bank 2 |
| 22 | Arran islands (north) | 185 | Lacken Bay |
| 23 | Arran islands (outer) | 186 | Lambay / Rockabill |
| 24 | Arran islands (west) | 187 | Langston & Emsworth |
| 25 | Arthurstown | 188 | Larne Lough |
| 26 | Axarfjord | 189 | Latrabjarg |
| 27 | Baginbun Bay | 190 | Laxey |
| 28 | Bakkafjord 1 | 191 | Leestone |
| 29 | Bakkafjord 2 | 192 | Leman Bank |
| 30 | Balbriggan | 193 | Lemon Bank |
| 31 | Balbriggan grounds | 194 | Little Fisher Bank |
| 32 | Ballantrae Bank | 195 | Liverpool grounds 1 |
| 33 | Ballinacourty | 196 | Liverpool grounds 2 |
| 34 | Ballinskelligs | 197 | Londmundarfjord |
| 35 | Ballinskelligs Bay | 198 | Lonsvik |
| 36 | Ballycotton Bay | 199 | Looe Bay |
| 37 | Ballycroy Bay | 200 | Loch Foyle |
| 38 | Ballyhalbert Bay | 201 | Loch Ryan |
| 39 | Ballyheigue Bay | 202 | Loch Swilly |
| 40 | Ballyshannon | 203 | Lundy and Carmarthen |
| 41 | Ballyteige Bay | 204 | Madam Piper’s Bay |
| 42 | Baltimore | 205 | Magilligan Strand |
| 43 | Bantry Bay | 206 | Maguire’s Bank |
| 44 | Basurelle Bank | 207 | Malahide |
| 45 | Belfast Lough 1 | 208 | Mannin Bay |
| 46 | Belfast Lough 2 | 209 | Mar Bank |
| 47 | Bell Rock and Firth of the Tay | 210 | Marino |
| 48 | Bengore Head to Sheep Island | 211 | May Island grounds |
| 49 | Bertrahgboy Bay | 212 | Mevagissey Bay |
| 50 | Berwick grounds | 213 | Milford Haven |
| 51 | Between Cromer and Texel | 214 | Minard |
| 52 | Bideford Bay | 215 | Mine Head to Coninbeg rock |
| 53 | Bigbury Bay | 216 | Montrose Bank |
| 54 | Black Bank | 217 | Moray Firth |
| 55 | Blackpool to Liverpool | 218 | Morecambe Bay |
| 56 | Blacksod Bay | 219 | Mountain Foot ground |
| 57 | Blackwater Bank | 220 | Mounts Bay |
| 58 | Blackwater Estuary | 221 | Mullaghmore |
| 59 | Boppep Bay to Rye | 222 | Mulroy Bay |
| 60 | Botany Gut | 223 | Newburgh to Stonehaven |
| 61 | Bouy of the Tay and Bell Rock | 224 | North Foreland & Margate |
| 62 | Boyne (mouth) | 225 | Nymph Bank |
| 63 | Brandon Bay | 226 | Olafsvik |
| 64 | Bray Head | 227 | Old Hake |
| 65 | Breidifjord | 228 | Old Head to Dunworley |
| 66 | Brewing Scar | 229 | Old Head to Hake Head |
| 67 | Bridlington Bay | 230 | Outer Dowsing |
| 68 | Brighton | 231 | Outer Gabbard |
| 69 | Brixham | 232 | Outer Thames grounds |
| 70 | Brixham winter grounds | 233 | Patreksfjord |
| 71 | Broad fourteens | 234 | Pittenweem Fluke Hole |
| 72 | Broadhaven Bay | 235 | Plymouth |
| 73 | Brown Bank | 236 | Plymouth grounds |
| 74 | Buchaness to Stonehaven | 237 | Plymouth Sound |
| 75 | Buchaness to Girdle Ness | 238 | Poole Harbour |
| 76 | Buchaness (south) | 239 | Porter’s Rock to Arklow Rock |
| 77 | Buckhaven | 240 | Portland Bay |
| 78 | Bundoran | 241 | Portrush 1 |
| 79 | Burbo Bank | 242 | Portrush 2 |
| 80 | Burghead and Findorn | 243 | Raghley |
| 81 | Burnmouth to Buchaness | 244 | Ramsgate grounds |
| 82 | Burnt Island | 245 | Reykjanes (northwest) |
| 83 | Burr Point | 246 | Ridge Bank |
| 84 | Caernarfon Bay 1 | 247 | River Colne |
| 85 | Caernarfon Bay 2 | 248 | River Tay |
| 86 | Cahore point and Kilmicheal point | 249 | Rock Bank |
| 87 | Cambeltown | 250 | Ross Bay |
| 88 | Cape Clear & Stags | 251 | Rossmore to West Cove |
| 89 | Cardigan Bay | 252 | Roundstone |
| 90 | Carlingford Loch | 253 | Rush grounds |
| 91 | Carmarthen Bay | 254 | Rye Bay |
| 92 | Carrickfergus | 255 | Saltees to Helvick Head |
| 93 | Carrigholt Bay | 256 | Sandiette Bank |
| 94 | Castletownsend 1 | 257 | Scarborough |
| 95 | Castletownsend 2 | 258 | Scarborough (SE 40-50 miles) |
| 96 | Cheek Point to Dunmore East | 259 | Schull |
| 97 | Clew Bay | 260 | Seareach / Nore |
| 98 | Clonakilty Bay | 261 | Shields & Coquet isle |
| 99 | Clougherhead | 262 | Shipwash |
| 100 | Cloughey | 263 | Silver Pit (Inner) |
| 101 | Constaple Bank | 264 | Skagafjord |
| 102 | Cork Harbour | 265 | Skerries |
| 103 | Costello Bay | 266 | Skerries Bay |
| 104 | Courtmacsherry | 267 | Skerries Sound |
| 105 | Courtown | 268 | Skjalfandafloi |
| 106 | Cove | 269 | Smith’s Knoll |
| 107 | Craster grounds | 270 | Sole Pit |
| 108 | Cromarty Firth | 271 | South Foreland to Wintertonness |
| 109 | Cromer Knoll | 272 | South Papey |
| 110 | Crookhaven | 273 | South Reykjanes peninsula |
| 111 | Cullercoats (north) | 274 | Sowe Bank |
| 112 | Cummen Bay | 275 | Spurn Point |
| 113 | Cushendall | 276 | St. Abbs |
| 114 | Cushenden Bay | 277 | St. Andrews 1 |
| 115 | Dingle Bay | 278 | St. Andrews 2 |
| 116 | Dogger and Heliogland | 279 | St. Finians |
| 117 | Dogger Bank (east) | 280 | St. Johns to Carlingford |
| 118 | Dogger Bank (west) | 281 | Start Bay to Portland |
| 119 | Donegal Bay | 282 | Start to Portland |
| 120 | Donegal Bay (northeast) | 283 | Stonehaven sand bed |
| 122 | Dublin Bay | 284 | Strangford Loch |
| 123 | Dundrum Bay | 285 | Suna grounds |
| 124 | Dungarvan Bay | 286 | Svortuloft |
| 125 | Dunkerron to Dunmore | 287 | Swansea Bay |
| 126 | Dunmanus Bay | 288 | Swarte Bank |
| 127 | East of Galloper | 289 | Talknafjord |
| 128 | Eddystone (southeast) | 290 | Templenoe to Westcove |
| 129 | Eldejarbanki | 291 | Texel & Tershelling |
| 130 | Essex coast | 292 | Texel to Schelling |
| 131 | Fairlight to Dungeness | 293 | The Garden |
| 132 | Falmouth Bay | 294 | The Lizard & Black Head |
| 133 | Falmouth Harbour | 295 | The Reefs |
| 134 | Faxa Bay | 296 | The Ridge |
| 135 | Finnafjord & Langness | 297 | The Varne |
| 136 | Firth of the Forth grounds | 298 | The Wash |
| 137 | Galway Bay | 299 | Thistlefjord |
| 138 | Girdle Ness to Bell Rock | 300 | Torbay |
| 139 | Glandore Head to Galley Head | 301 | Tralee Bay |
| 140 | Glenarm Bay | 302 | Trevose Head to Hartland Point |
| 141 | Golspie | 303 | Unionhall |
| 142 | Great Burbo Bank | 304 | Upper Cover |
| 143 | Great Fisher Bank | 305 | Vestrahorn |
| 310 | Great Silver Pit (Outer) | 306 | Vopnafjord |
| 145 | Greencastle | 307 | Waterford Harbour |
| 146 | Greenore | 309 | Well Bank 1 (Inner) |
| 147 | Halamid | 308 | Well Bank 2 (Outer) |
| 148 | Hali grounds | 311 | West Cove |
| 149 | Hartlepool and coquet | 312 | West Hoyle Bank |
| 150 | Hartlepool to Berwick | 313 | West Reykjanes peninsula |
| 151 | Harwich / Orford | 314 | Westernmost Rough |
| 152 | Heligoland (north) | 315 | Westman Islands |
| 153 | Helvick Head to Mine Head | 316 | Westport Bay |
| 154 | Hemptons Turbot Bank | 317 | Wexford Bay 1 |
| 155 | High Whitby | 318 | Wexford Bay 2 |
| 156 | Holman ground | 319 | Weymouth Bay |
| 157 | Hook Light | 320 | Whitesand Bay |
| 158 | Hook of Holland | 321 | Whiting Bay |
| 159 | Hornbjarg | 322 | Wolf Rock |
| 160 | Hornvik | 323 | Yellow Bank |
| 161 | Hraunamid | 324 | Yorkshire Hole / Sole Pit |
| 162 | Hunafloi | 325 | Youghal Bay |
| 163 | Hythe Bay |  |  |

**Table S7: Cumulative bottom trawling by ground area size category between 1825 and 1900.**

| Trawling ground area | Number of trawling grounds | Range of cumulative SAR | Median cumulative SAR | Mean cumulative SAR (95% confidence interval) |
| --- | --- | --- | --- | --- |
| 0 - 10 km2 | 37 | 3.1– 1626.1 | 288.8 | 372.0 (220.0, 524.0) |
| 10 - 50 km2 | 89 | 0.5 – 2399.1 | 56.6 | 333.2 (215.6, 450.9) |
| 50 - 200 km2 | 77 | 0.1 – 1704.7 | 47.6 | 180.9 (107.1, 254.6) |
| 200 - 1000 km2 | 76 | 0.1 – 888.5 | 19.3 | 108.5 (66.8, 150.3) |
| 1000 - 10000 km2 | 36 | 0.1 – 271.6 | 19.5 | 37.5 (19.2, 55.9) |
| >10000 km2 | 10 | 0.3 – 28 | 5.4 | 8.2 (1.9, 14.4) |
| All grounds | 324 | 0.07 – 2399.1 | 39.2 | 206.5 (163.4, 249.6) |

**Table S8: Estimated total swept area, sediment resuspension rates, and total mass of sediment resuspended and mixed in 1825, 1850, 1875, 1900, 1916, and 1925. Total across trawler type are also provided. Sediment and resuspension rates represent the average of 1000 runs, with values in parentheses showing 95% quantiles. SA = sail, ST = steam, MT = motor, DR = dredger.**

| **Trawler type** | **Year** | **Swept area (km²)** | **Resuspension rate (kg m⁻²)** | **Total sediment resuspended (Mt)** | **Total sediment mixed (Mt)** |
| --- | --- | --- | --- | --- | --- |
| SA | 1825 | 18,300 | 1.51 (0.80, 2.25) | 27.57 (14.53, 41.04) | 651 (250, 1100) |
| SA | 1850 | 34,200 | 1.58 (0.85, 2.33) | 54.11 (29.16, 79.84) | 1225 (463, 2082) |
| SA | 1875 | 102,000 | 1.43 (0.74, 2.14) | 145.94 (75.58, 218.78) | 3692 (1424, 6221) |
| SA | 1900 | 156,000 | 1.43 (0.75, 2.14) | 223.80 (116.88, 334.16) | 5689 (2108, 9640) |
| SA | 1916 | 55,800 | 1.75 (1.20, 2.52) | 97.51 (55.72, 140.85) | 715 (354, 654) |
| SA | 1925 | 44,200 | 1.14 (0.60, 1.69) | 50.30 (26.64, 74.81) | 912 (692, 3249) |
| ST | 1875 | 6,350 | 2.06 (1.13, 2.99) | 13.06 (7.16, 18.96) | 203 (15, 480) |
| ST | 1900 | 124,000 | 2.71 (1.52, 3.89) | 336.52 (189.18, 484.06) | 3721 (282, 7512) |
| ST | 1916 | 146,000 | 3.43 (2.06, 4.80) | 499.54 (299.93, 699.71) | 4905 (456, 9816) |
| ST | 1925 | 262,000 | 3.62 (2.11, 5.13) | 949.27 (554.35, 1345.4) | 8726 (1740, 13000) |
| MT | 1900 | 12,200 | 3.58 (2.04, 5.12) | 43.65 (24.86, 62.48) | 361 (27, 729) |
| MT | 1916 | 19,700 | 4,65 (2.83, 6.48) | 91.84 (55.81, 127.99) | 648 (61, 1300) |
| MT | 1925 | 3,150 | 3.36 (2.09, 4.63) | 10.56 (6.57, 14.58) | 129 (12, 255) |
| DR | 1825 | 6,040 | 1.02 (0.51, 1.52) | 6.14 (3.09, 9.92) | 451 (124, 823) |
| DR | 1850 | 12,700 | 0.91 (0.46, 1.36) | 11.54 (5.78, 17.29) | 1037 (283, 1881) |
| DR | 1875 | 13,400 | 0.89 (0.43, 1.35) | 11.91 (5.75, 18.07) | 1060 (294, 1916) |
| DR | 1900 | 9,590 | 0.95 (0.48, 1.41) | 9.08 (4.60, 13.55) | 773 (211, 1460) |
|  | | | | | |
| All trawlers | 1825 | 24,320 | n/a | 33.72 (17.63, 50.24) | 1100 (374, 1923) |
| 1850 | 46,910 | n/a | 65.64 (34.94, 97.13) | 2600 (746, 3963) |
| 1875 | 122,050 | n/a | 170.9 (88.05, 255.08) | 4960 (1733, 8617) |
| 1900 | 302,310 | n/a | 613.05 (335.53, 894.26) | 10540 (2628, 19341) |
| 1916 | 221,320 | n/a | 688.94 (411.45, 968.55) | 7670 (871, 11770) |
| 1925 | 309,540 | n/a | 1010.14 (587.56, 1434.74) | 10740 (2444, 20920) |

1. **Supplementary Figures**


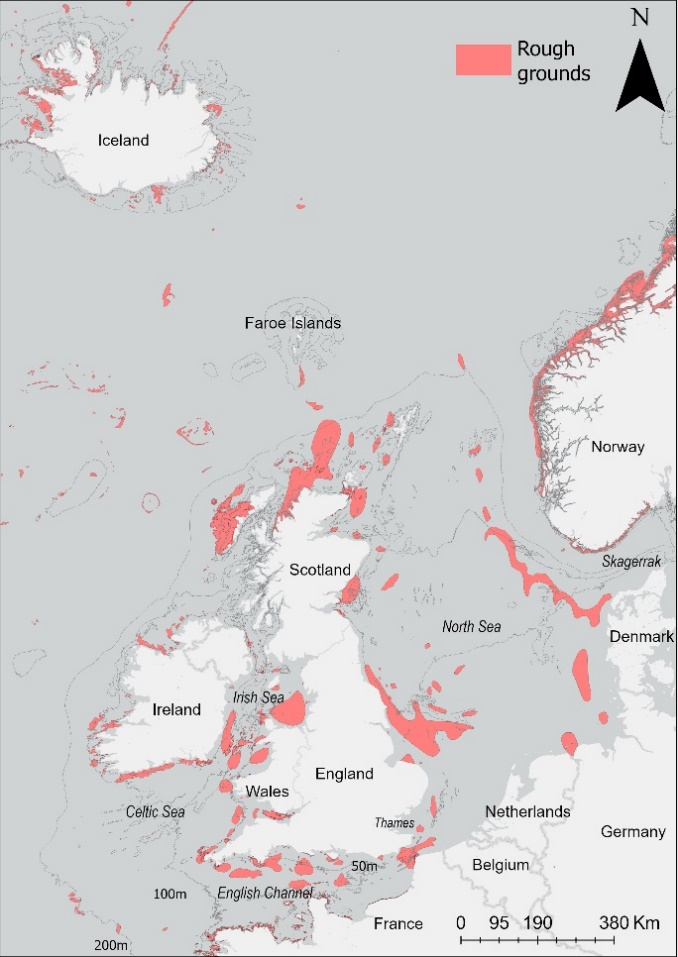

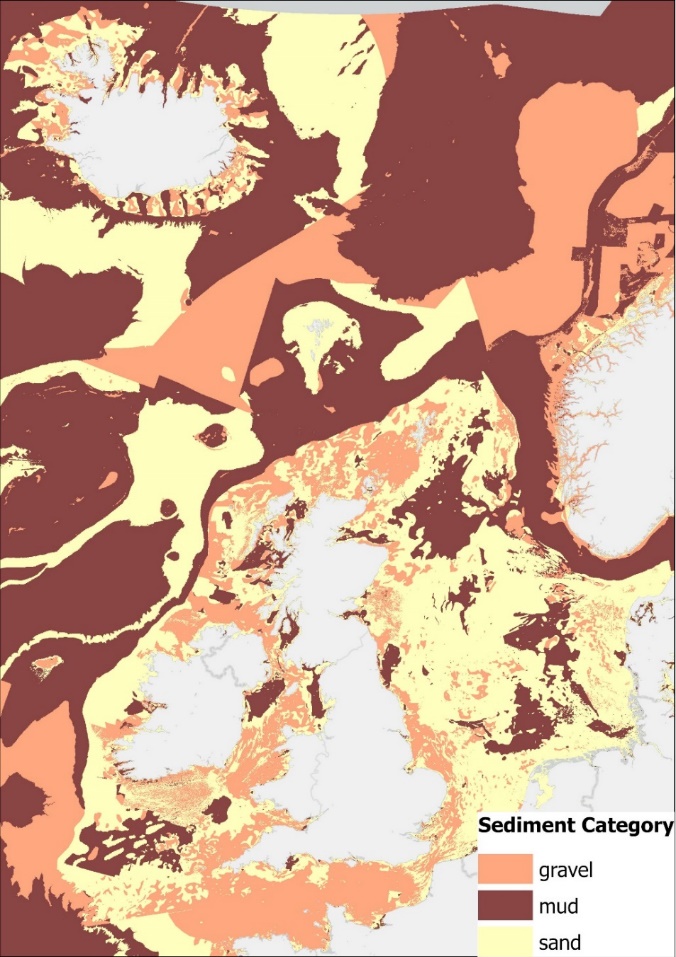


**Figure S1: (A) Study area showing countries, sea areas (italics), and the location of rough grounds (red polygons). Rough grounds are a composite of areas classified as ‘rock’ in EMODnet (https://emodnet.ec.europa.eu/en) and SHOM (https://www.services.data.shom.fr), and as ‘rocks and stones’ in Olsen (1883). (B) Distribution of the main sediment categories (gravels, muds, and sands) in the study area, reclassified from benthic broadscale habitat types by EMODnet.**

**
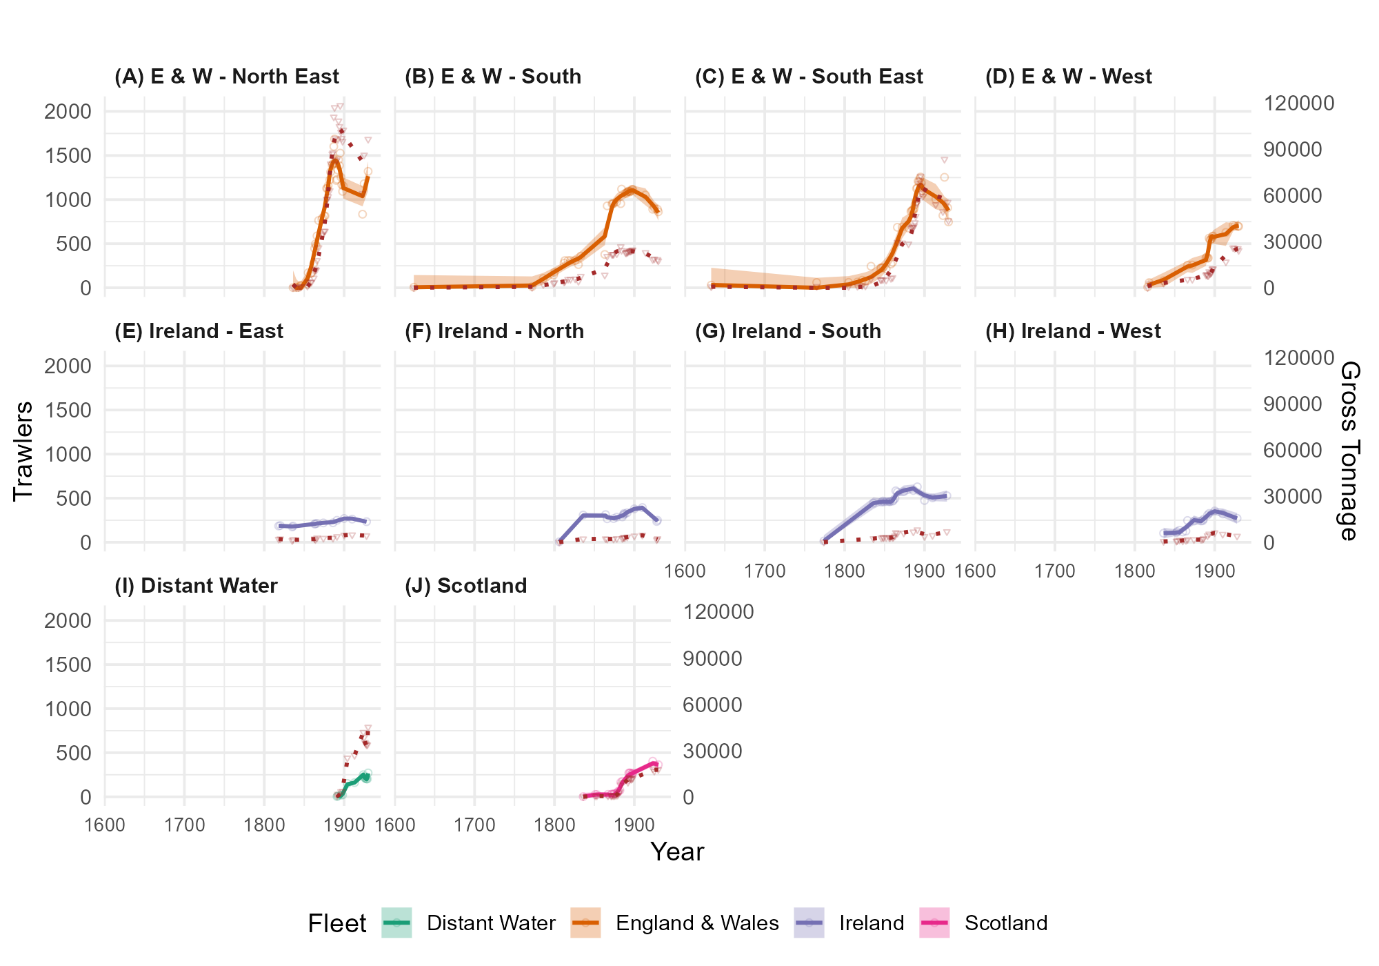
**

**Figure S2: Estimated trawling capacity of regional fleets in terms of bottom trawlers (±95% confidence intervals) and associated gross tonnage (brown dotted lines). Fleets are categorized by region: (A–D) England and Wales, (E–H) Ireland, (I) Distant Water, and (J) Scotland. Raw values are overlaid for trawlers (circles) and gross tonnage (triangles).**

**
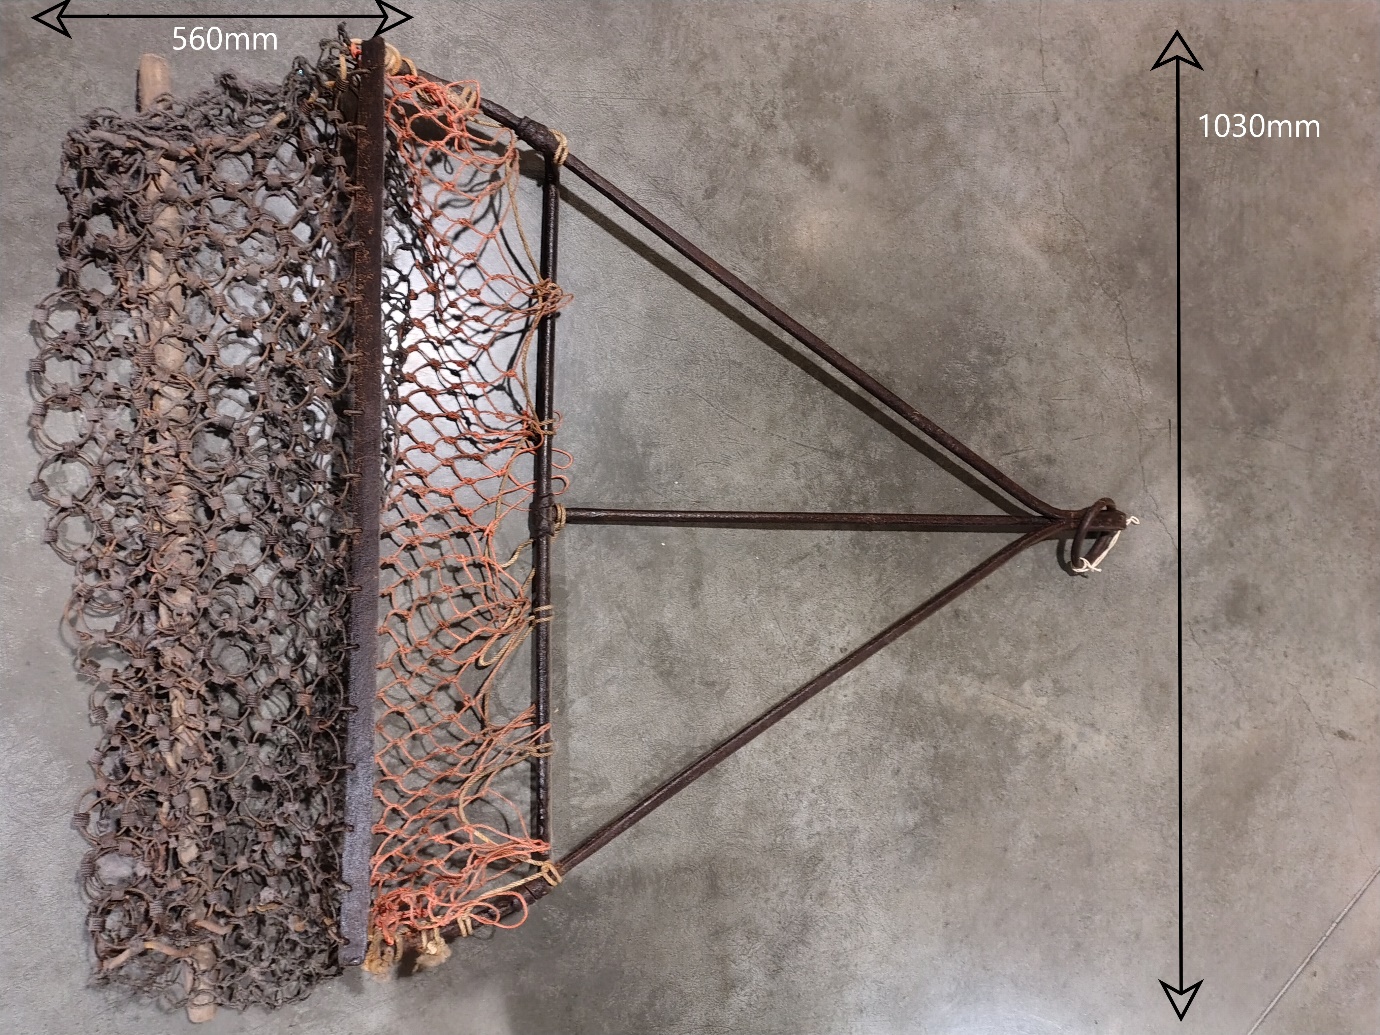
**

**Figure S3. 19th century Falmouth oyster dredge held at UK National Maritime Museum (visited February 19th, 2026). The image shows the dredge with measurements indicating total gear width measured from cutting bar (1030mm) and the length of the seabed-contacting bag (560 mm).**

**
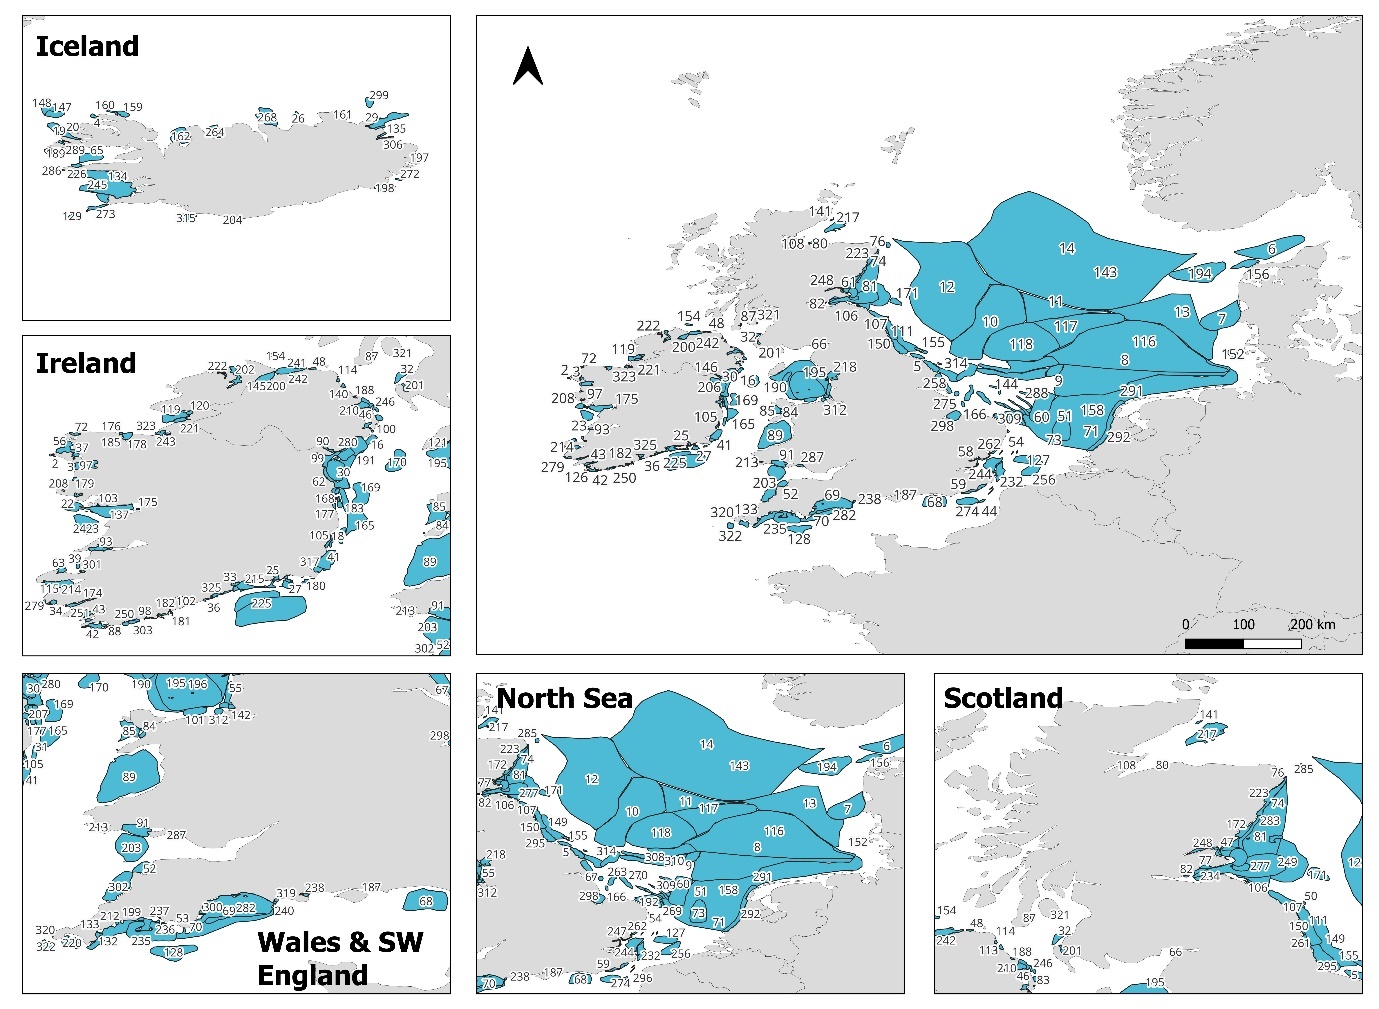
**

**Figure S4: Distribution of northeast Atlantic trawling grounds pre-1900 based on archival records. The full list of trawling ground names and corresponding numbers is provided in Table S6.**


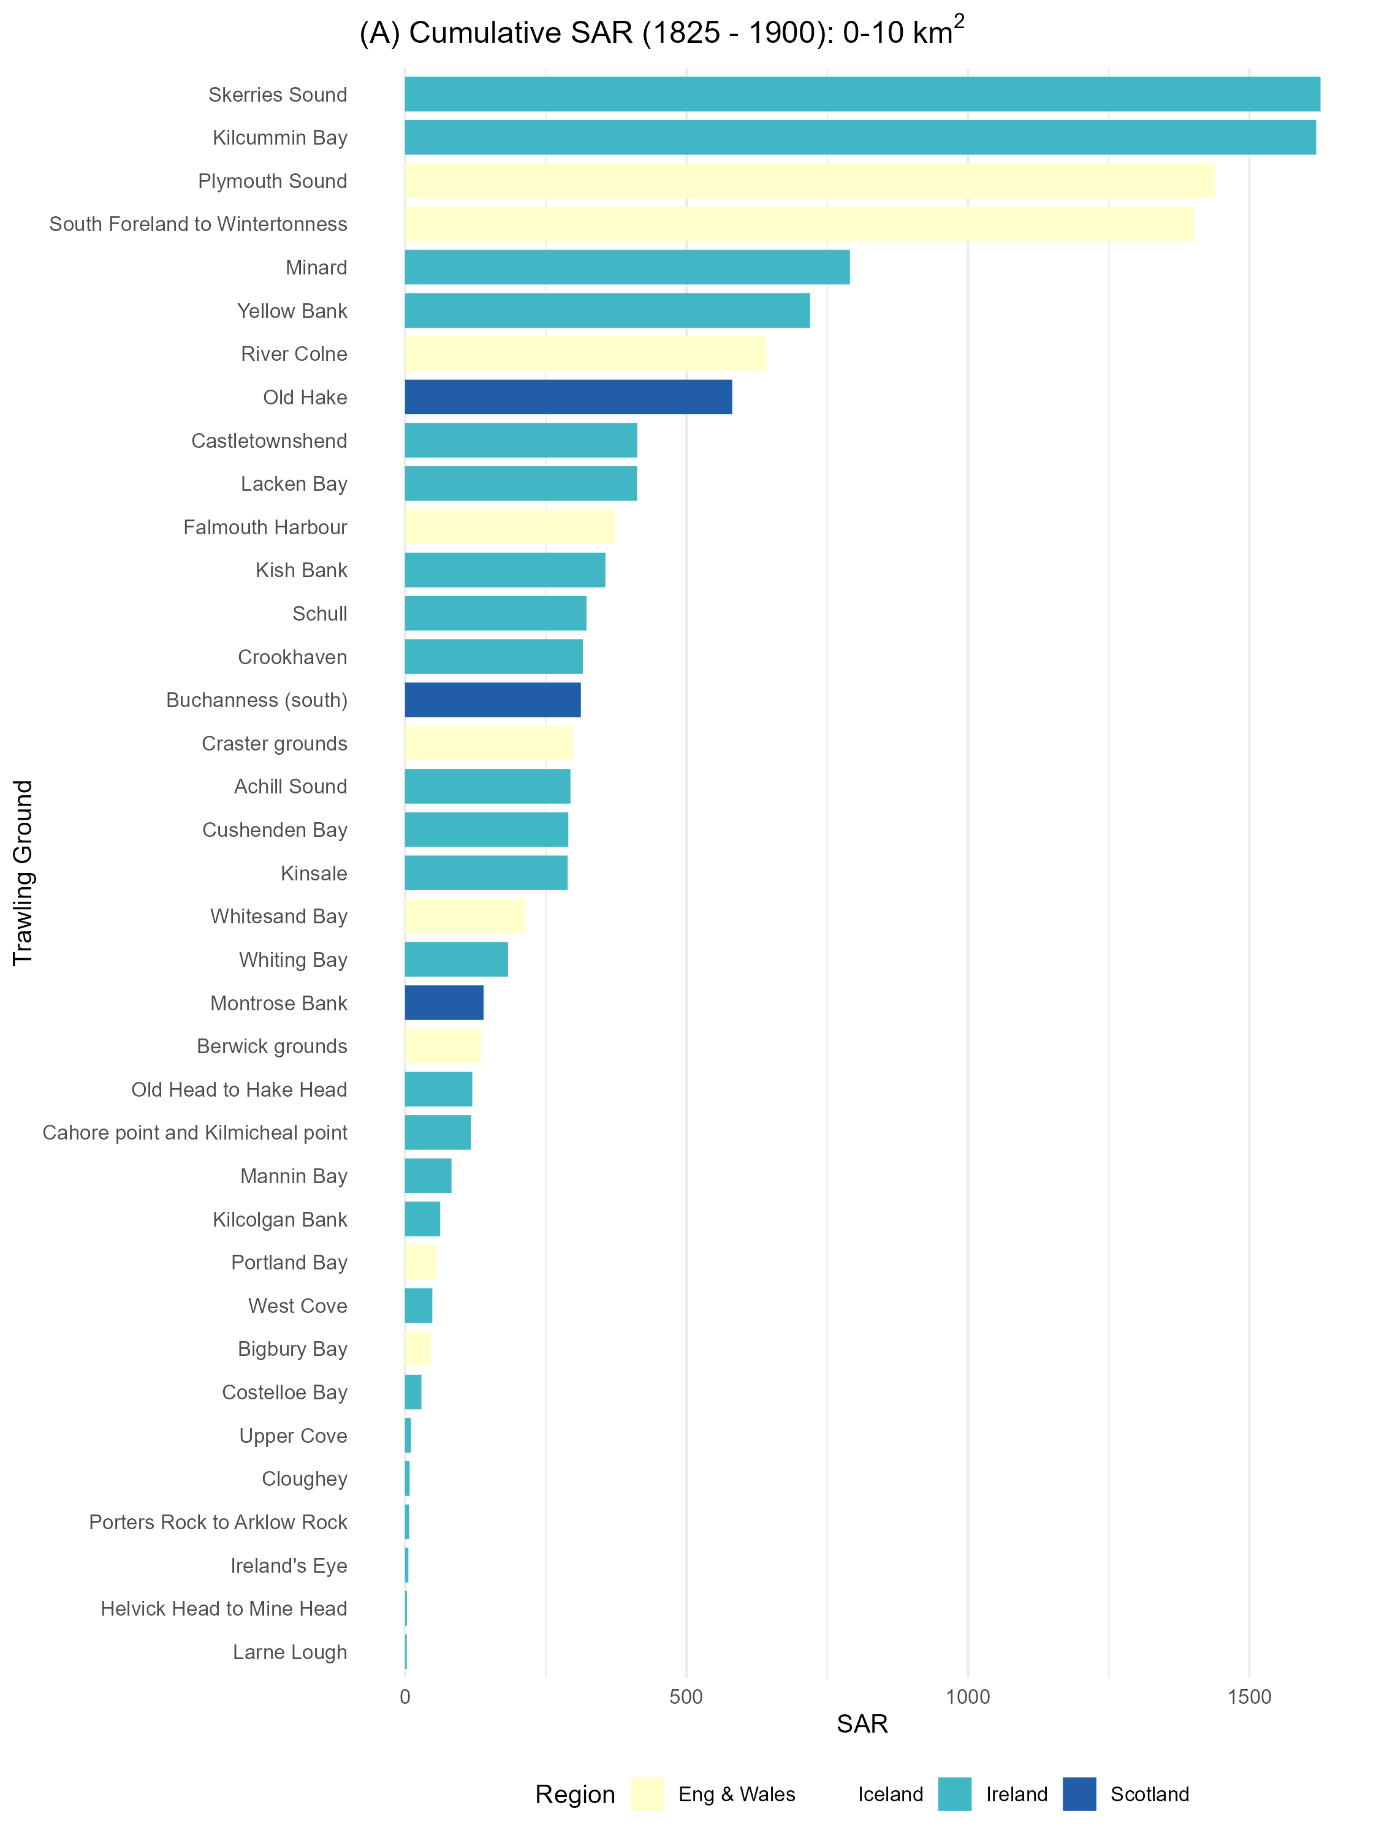

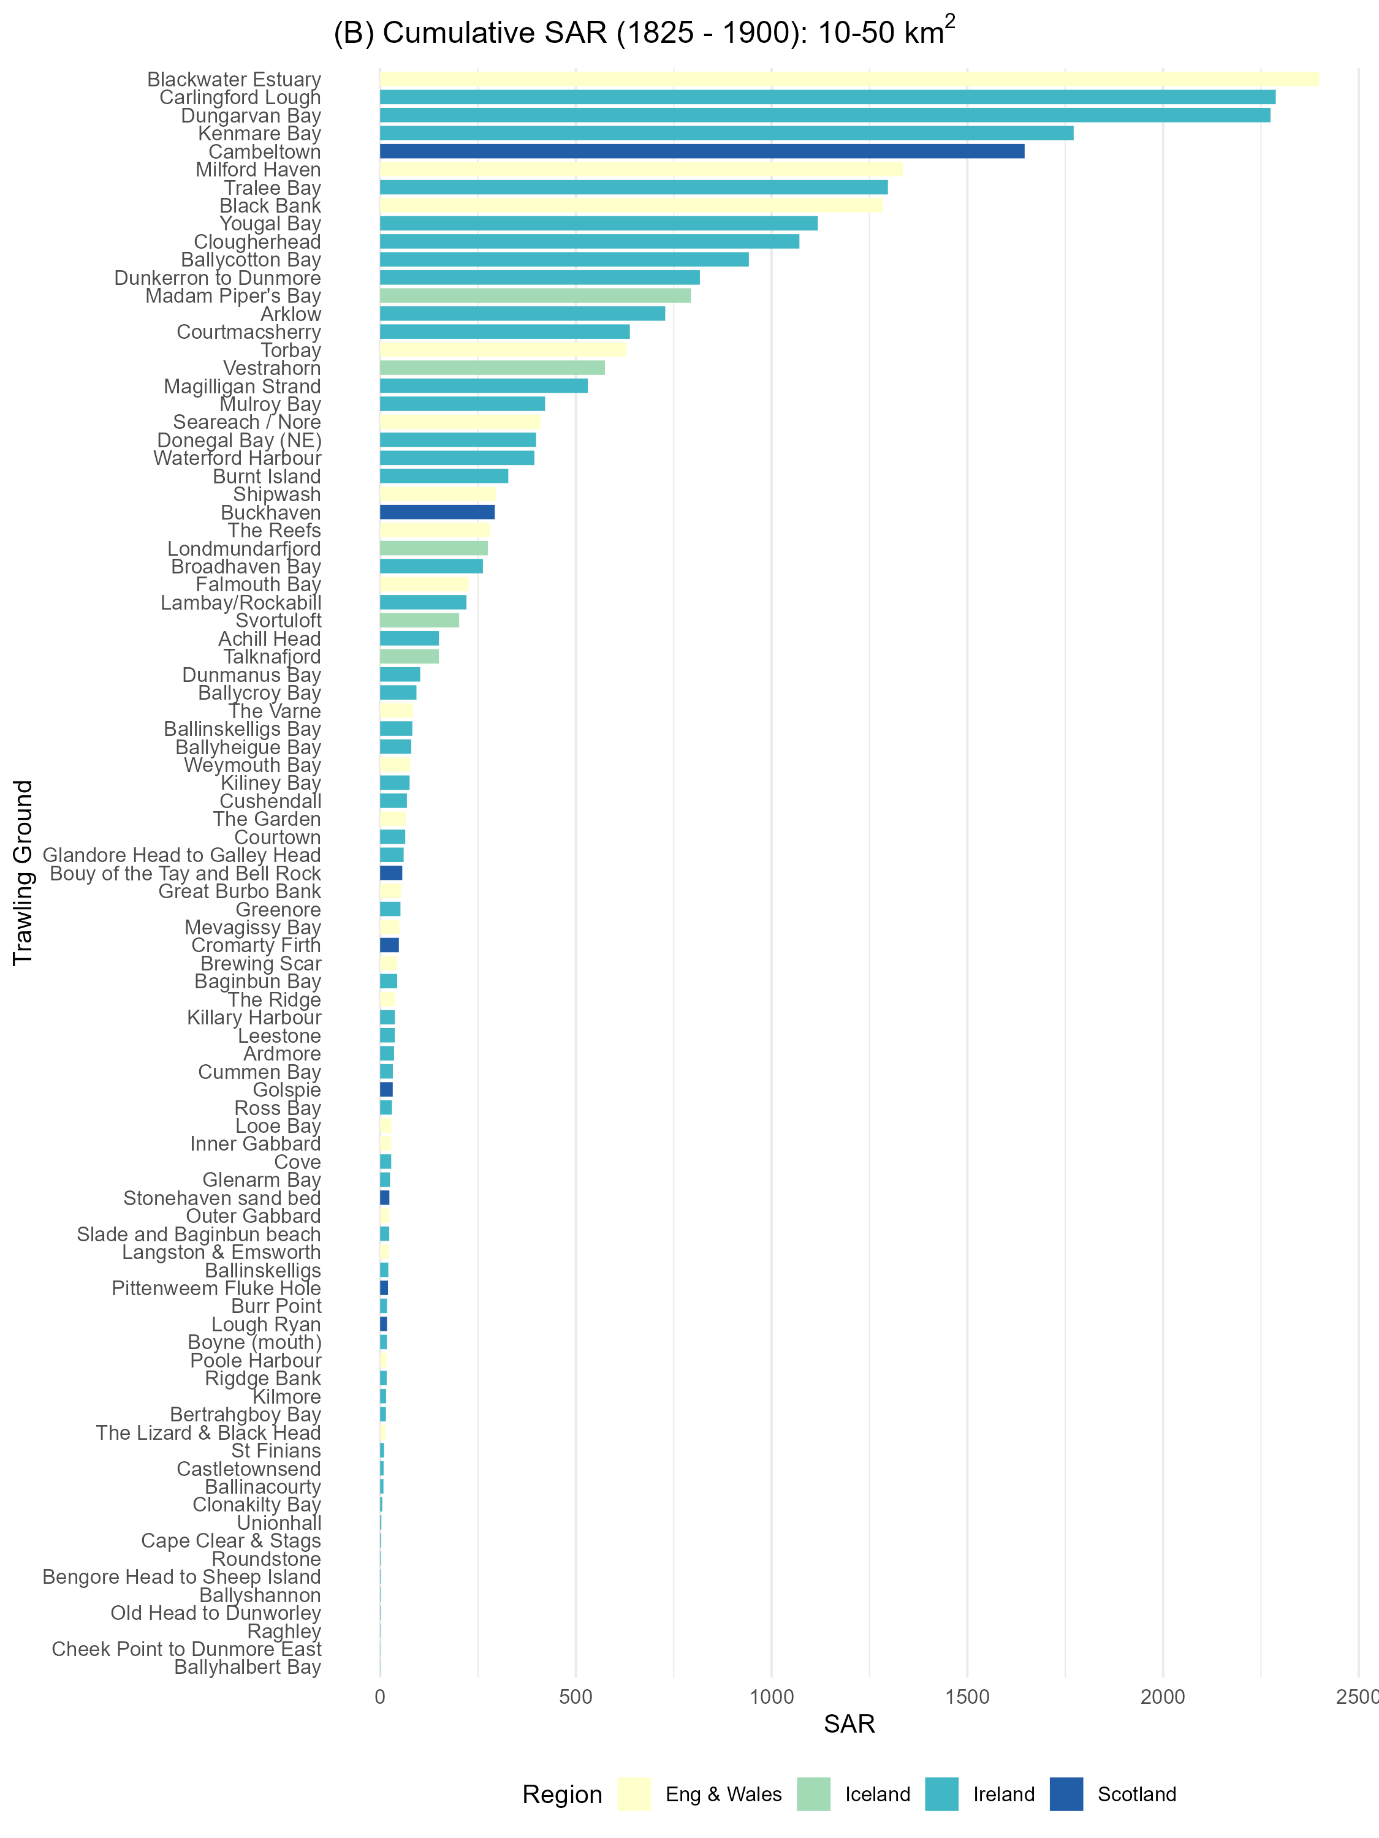

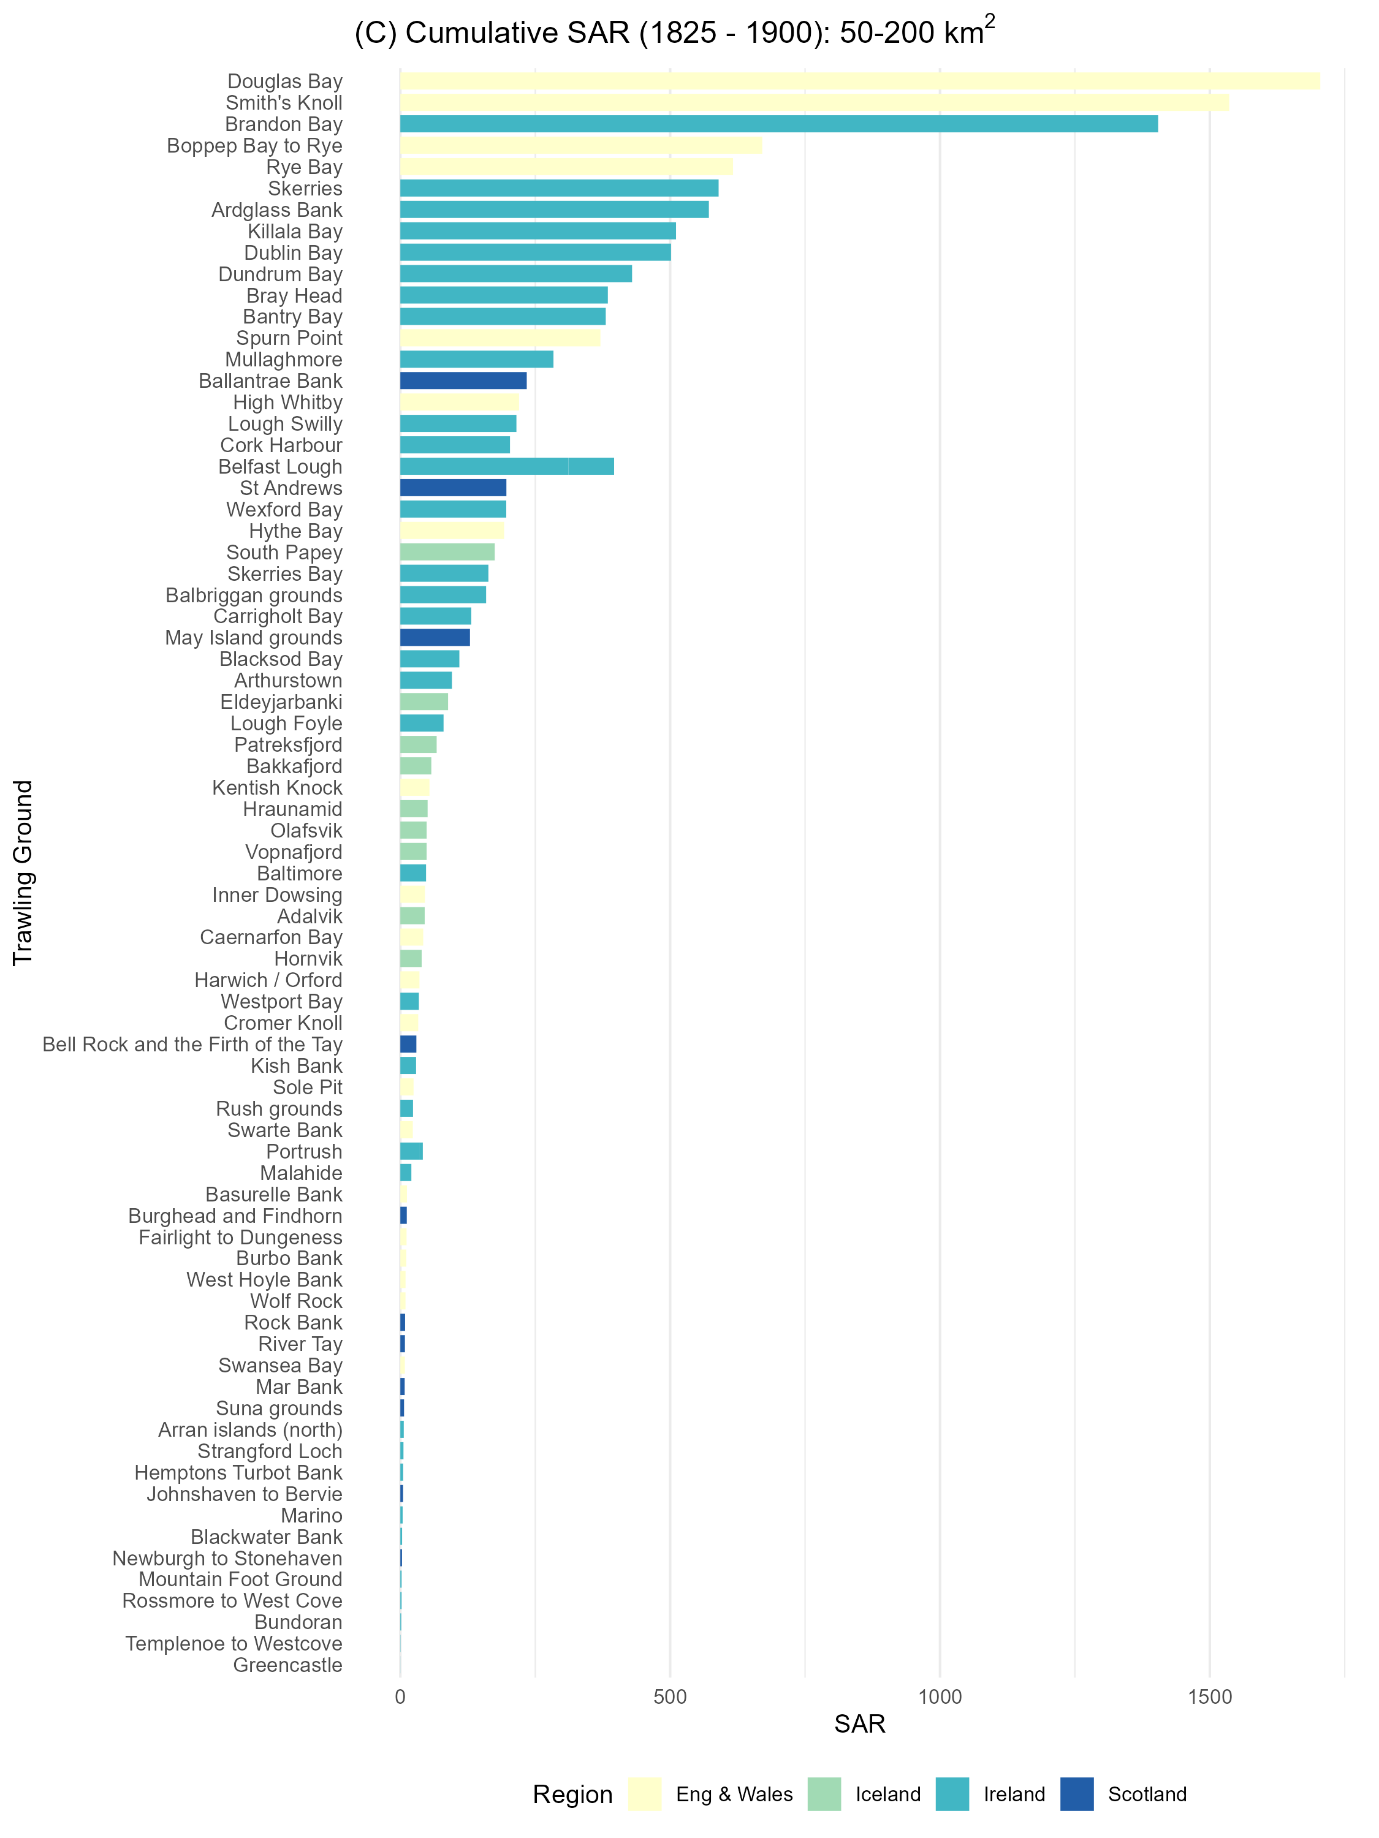

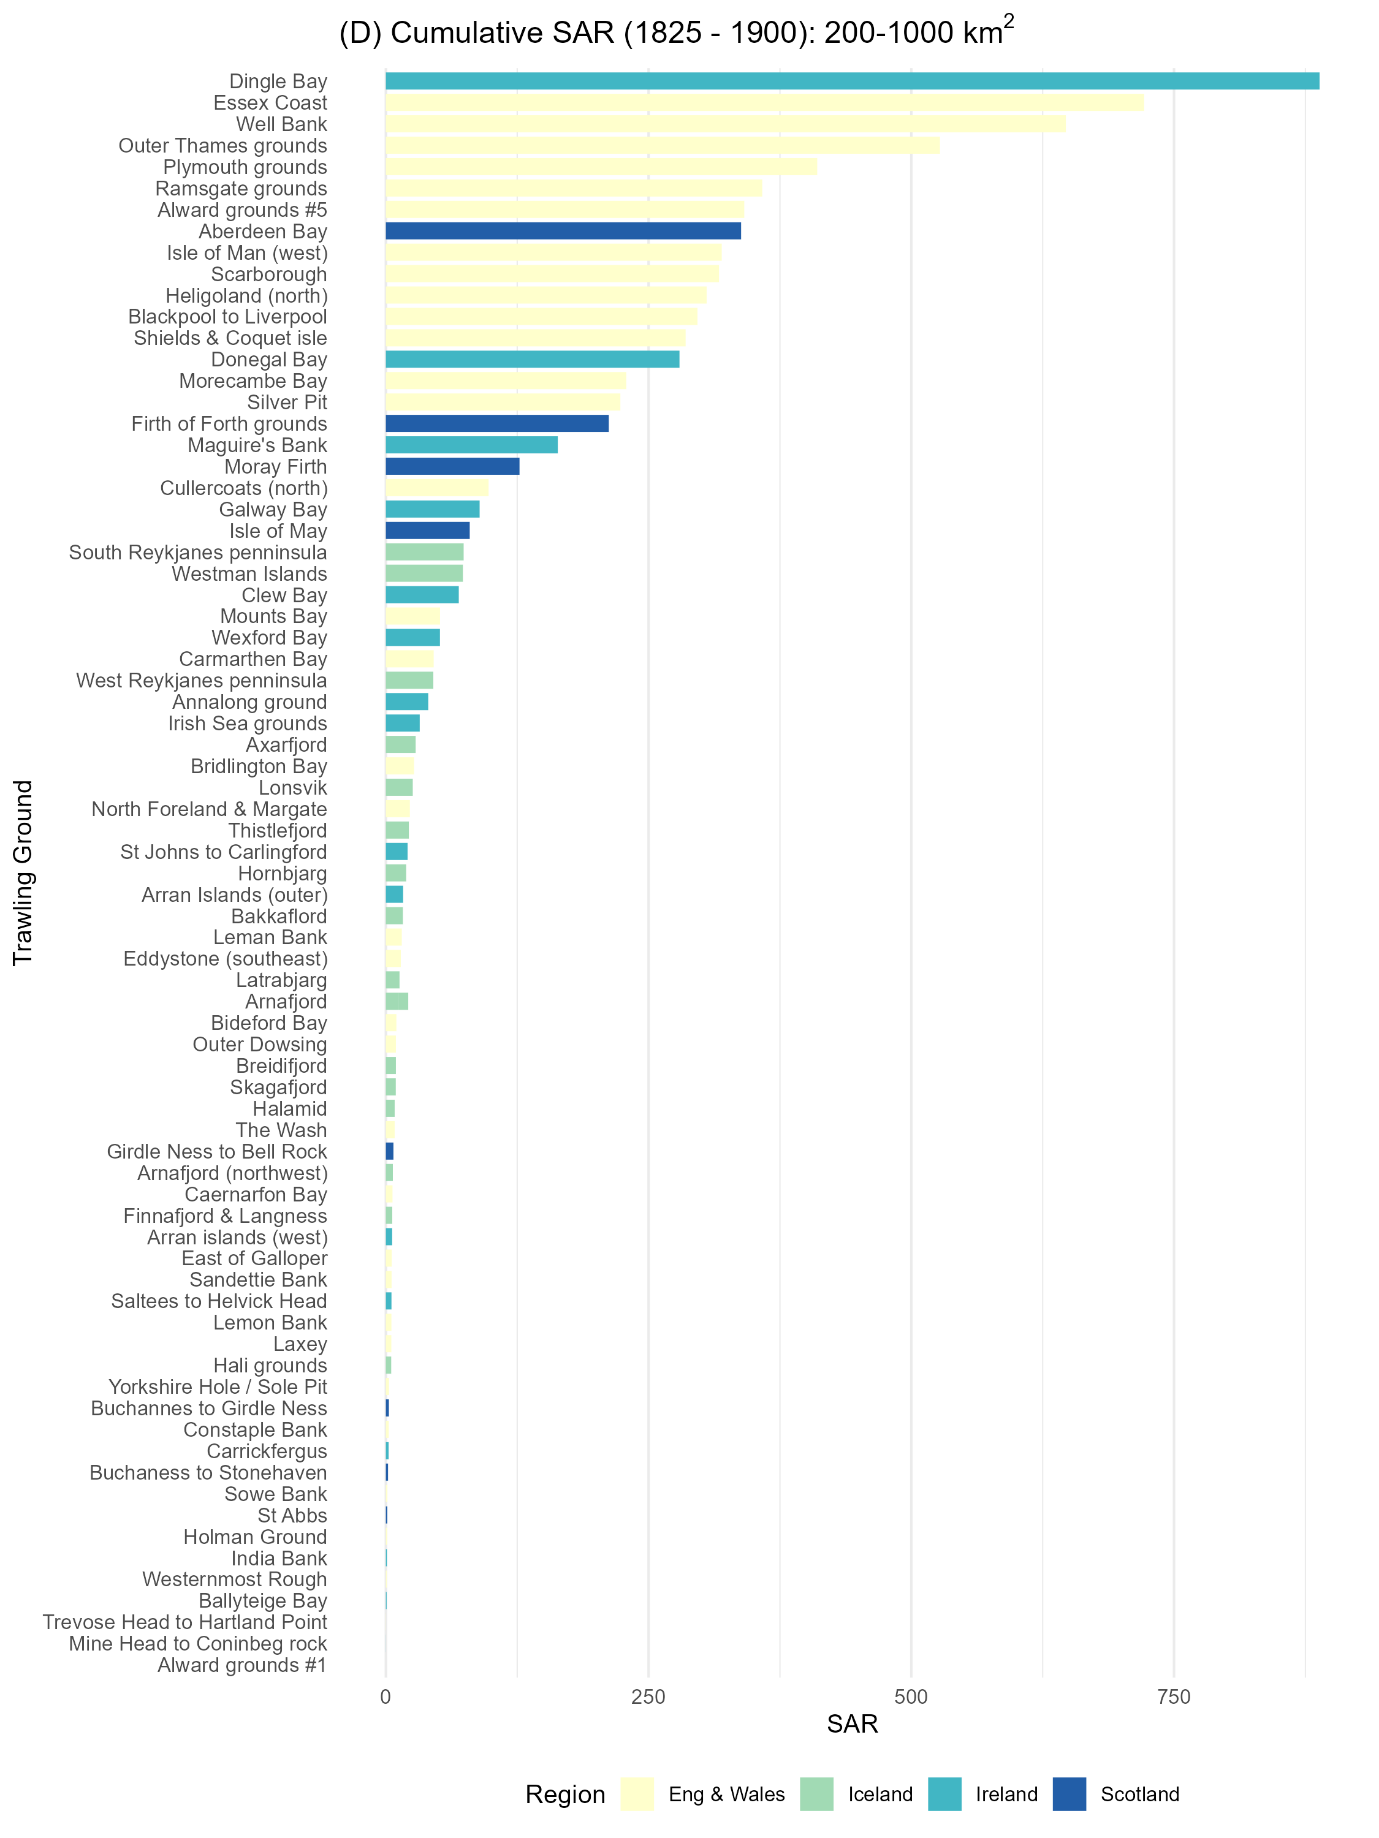

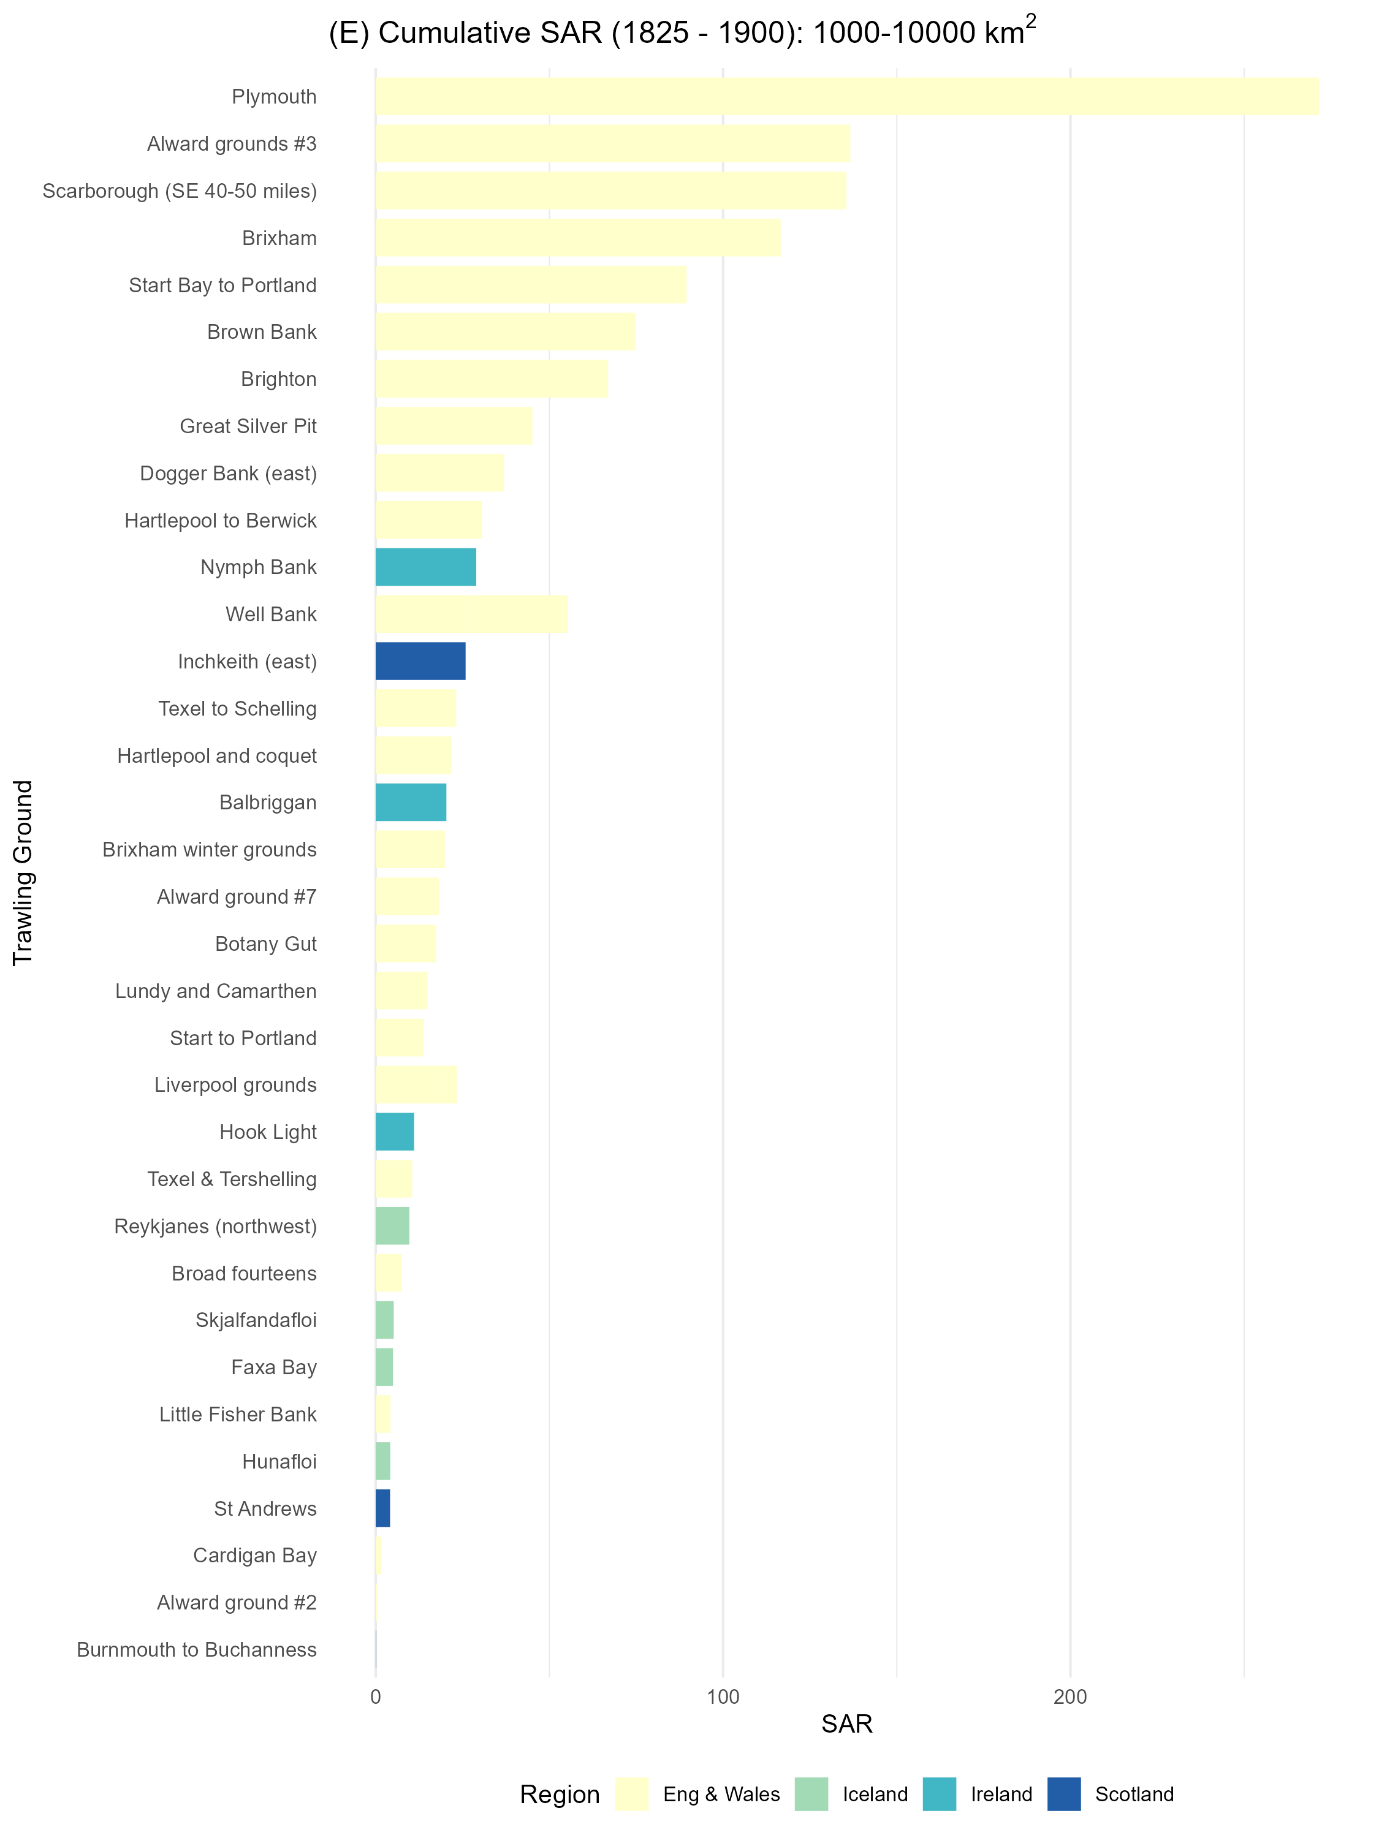

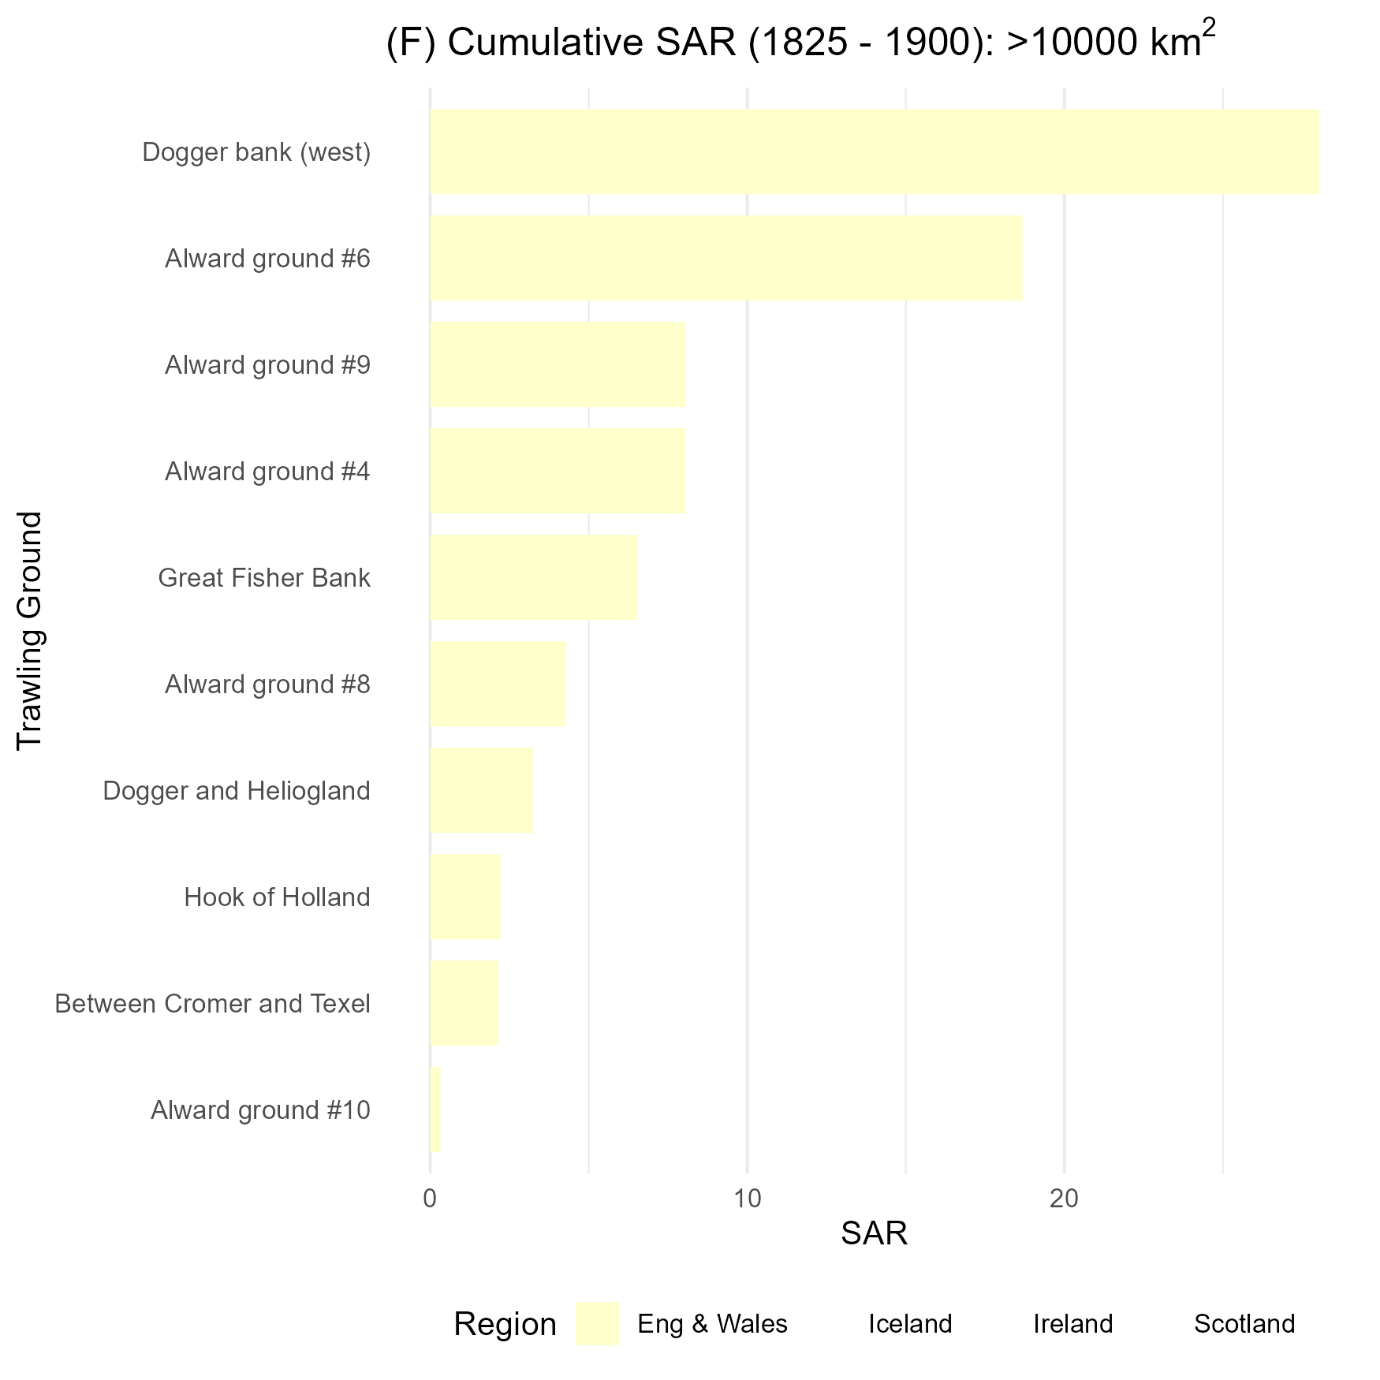


**Figure S5: Cumulative Swept Area Ratio between 1825 and 1900 at trawling grounds described in the study, categorized by ground size: (A) 0–10 km², (B) 10–50 km², (C) 50–200 km², (D) 200–1,000 km², (E) 1,000–10,000 km², and (F) >10,000 km².**


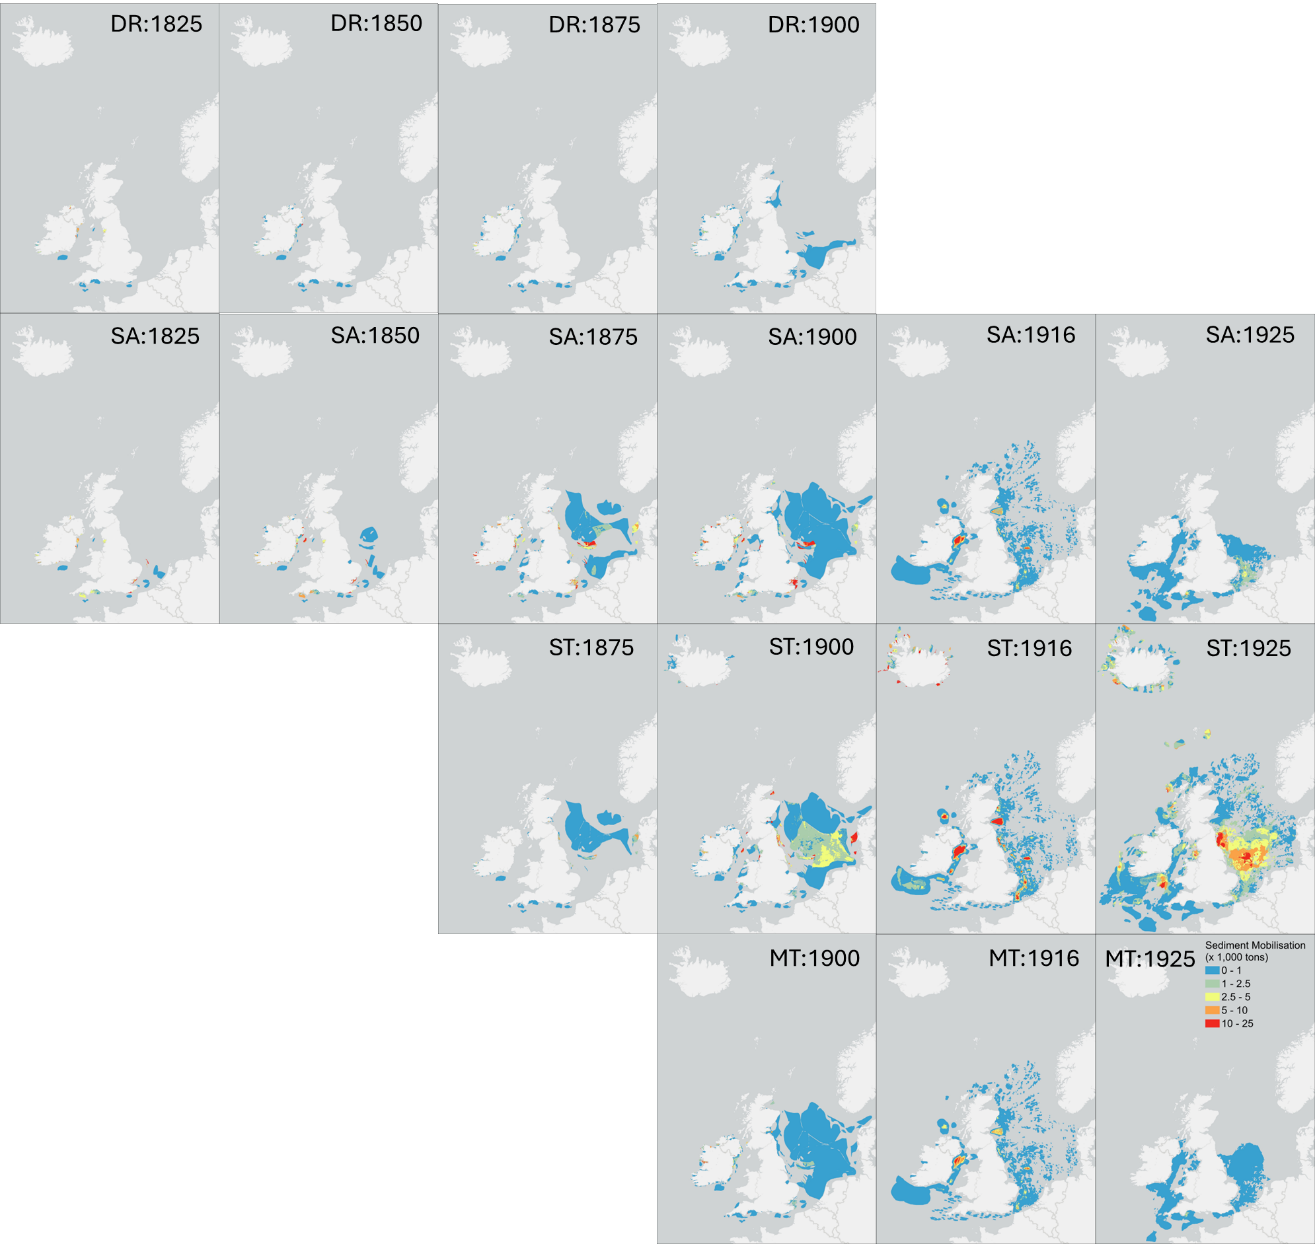


**Figure S6: Estimated annual sediment resuspended by dredging (DR), sail (SA), steam (ST), and motor (MT) fleets for the years 1825, 1850, 1875, 1900, 1916, and 1925**


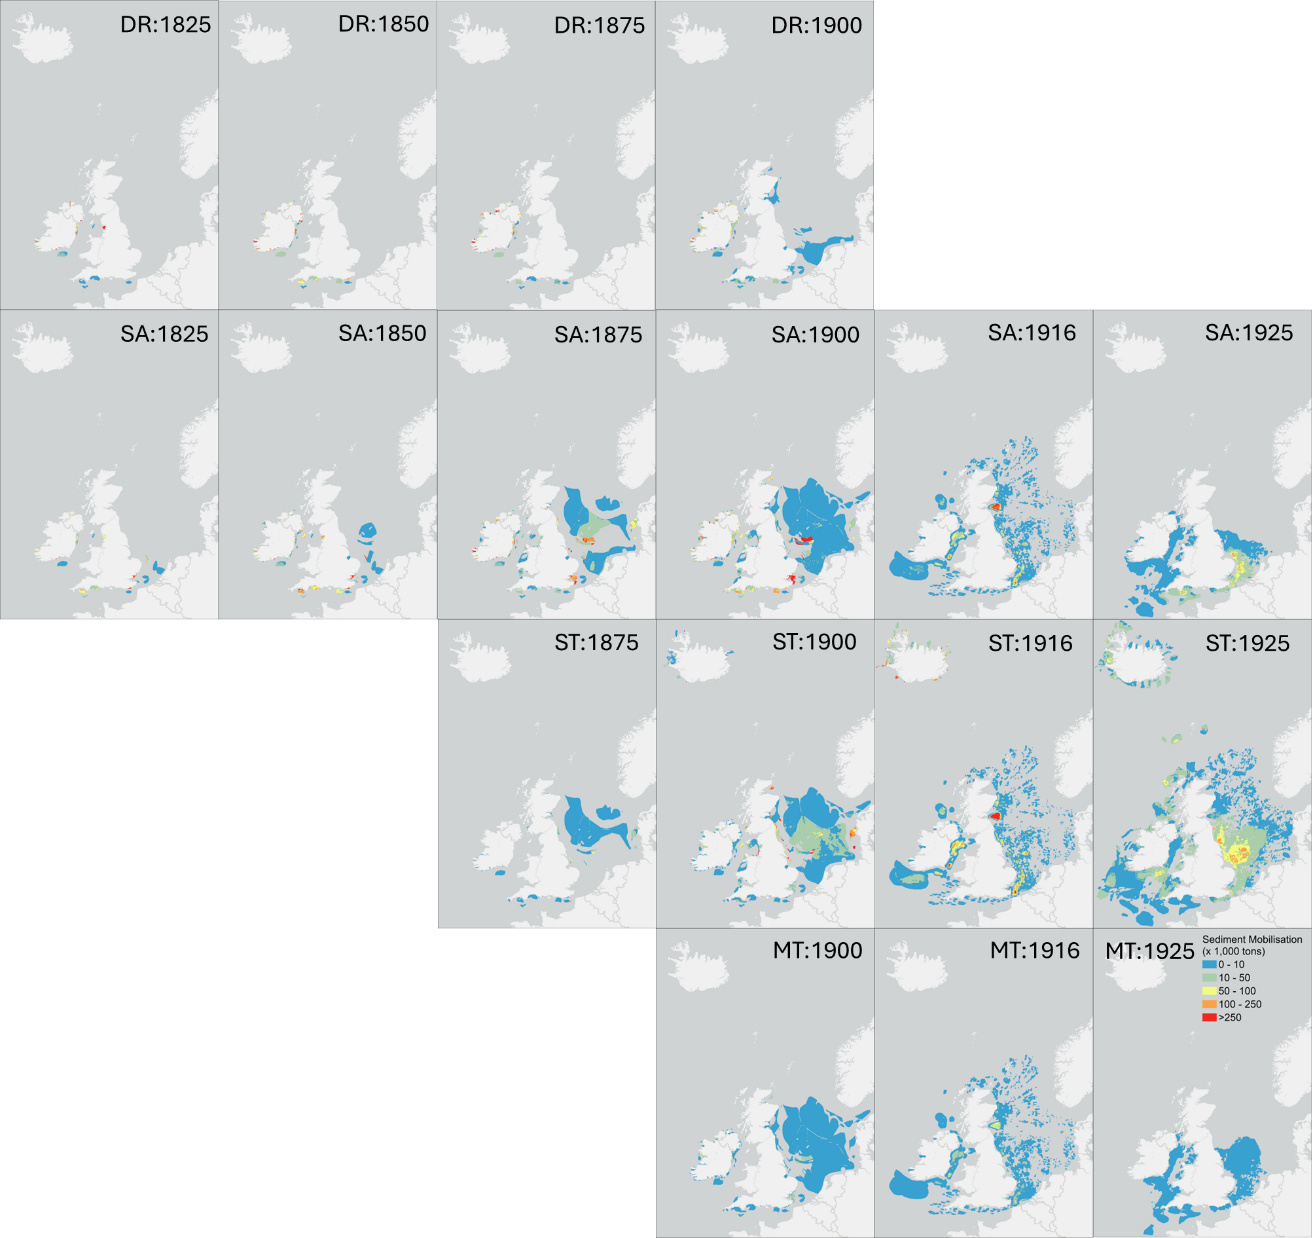


**Figure S7: Estimated annual sediment mixing by dredging (DR), sail (SA), steam (ST), and motor (MT) fleets for the years 1825, 1850, 1875, 1900, 1916, and 1925**

1. **Supplementary references**

**Full bibliographic details of sources cited in Table 1, including books and scientific articles (Part A), state papers (Part B), government inquiries (Part C), other reports (Part D), statistical tables (Part E), and nautical charts (Part F).**

**Part A - Books and Scientific Articles:**

Aikin, J. (1790). England delineated, or, a geographical description of every county in England and Wales: With a concise account of its most important products, natural and artificial, for the use of young persons. T. Bensley.

Alward, G. L. (1911). The development of the British sea fisheries during the 19th century, with special reference to the North Sea. Grimsby News Co., Grimsby.

Berkenhout, J. (1789). Synopsis of the natural history of Great Britain and Ireland: Comprehending the animal and fossil kingdoms. T. Cadell.

Calderwood, W. L. (1894). British sea fisheries and fishing areas, in view of recent national advance. Scottish Geographical Magazine, 10(2), 69–81.

Collins, J. W. (1889). The beam-trawl fishery of Great Britain: With notes on beam-trawling in other European countries. US Government Printing Office.

Cox, T., Hall, A., & Morden, R. (1738). Staffordshire – Warwickshire.

Davies, D. C. (1885). The fisheries of Wales. In Transactions of the Liverpool National Eisteddfod (Vol. 1884, pp. 285–320). Liverpool FC.

Ellis, J. (1755). An essay towards a natural history of the corallines, and other marine productions of the like kind, commonly found on the coasts of Great Britain.

Galloway, J. A. (2021). Fishing the Thames estuary in the later Middle Ages: Environment, technology and the metropolitan market for fish c. 1250–1550. Imago temporis: Medium Aevum, 243–271.

Garstang, W. (1900). The impoverishment of the sea. Journal of the Marine Biological Association of the United Kingdom, 6, 1–69.

Holdsworth, E. W. H. (1874). Deep-sea fishing and fishing boats. E. Stanford, London.

Holt, E. W. (1895). An examination of the present state of the Grimsby trawl fishery, with especial reference to the destruction of immature fish. Journal of the Marine Biological Association of the United Kingdom, 3(5), 339–446.

Jones, P. (2018a). The long “lost” history of bottom trawling in England, c. 1350–1650. International Journal of Maritime History, 30(2), 201–217.

Jones, P. (2018b). The spread of bottom trawling in the British Isles, c. 1700–1860. International Journal of Maritime History, 30(4), 681–700.

Llwyd, A., (1833). History of the Island of Mona, Or Anglesey... R. Jones.

McIntosh, W. C. (1895). Remarks on trawling. Journal of the Marine Biological Association of the United Kingdom, 3, 307–334.

Walsh, J., (1774). XLVI. Of torpedos found on the Coast of England. In a letter from John Walsh, Esq; FRS to Thomas Pennant, Esq; FR S. *Philosophical Transactions of the Royal Society of London*, (64), pp.464-473.

Russell, E. S. (1943). Trawling and the stocks of fish. Journal of the Royal Society of Arts, 91(4635), 198–214.

Thor, J.T., (1992). British trawlers in Icelandic waters: History of British steam trawling off Iceland 1889-1916 and the Anglo-Icelandic fisheries dispute 1896-1897.

Thor, J.T., (1995). British Trawlers and Iceland, 1919-1976. Department of Economic History of the University of Göteborg, 1995.

**Part B - State Papers:**
State Papers (1547). State papers published under the authority of His Majesty’s Commission: King Henry the Eighth (Vol. 1, Part II, Entry no. 110). Crown copyright.

State Papers (1570). Acts of the Privy Council of England, volume 7, pp. 326–351. British History Online.

State Papers (1618). Calendar of state papers, domestic series, of the reign of James I. Longman, Brown, Green, Longmans and Roberts.

State Papers (1631). Calendar of state papers, domestic series, of the reign of Charles I (Vol. 4, Entry no. 39). Longman, Green, Longmans and Roberts.

State Papers (1634). Calendar of state papers, domestic series, of the reign of Charles I (Vol. 6, Entry no. 26). Longman, Green, Longman, Roberts and Green.

State Papers (1638). Calendar of state papers, domestic series, of the reign of Charles I (Vol. 12, Entry no. 23). Longmans, Green and Co.

State Papers (1644). Calendar of state papers, domestic series, of the reign of Charles I (Vol. 19, Entry no. 82). H.M. Stationery Office.

State Papers (1655). Calendar of state papers, domestic series, Commonwealth (Vol. 8, Entry no. 1.452). Longman & Co.; Trübner & Co.; Parker & Co.; Macmillan & Co.; A. & C. Black; A. Thom.

State Papers (1664). Calendar of state papers, domestic series, of the reign of Charles II (Vol. 3, Entry no. 146). Longman, Green, Longman and Roberts.

State Papers (1670). Calendar of state papers, domestic series, Charles II, with addenda 1660–1670 (Vol. 10, Entry no. 111). H.M. Stationery Office.

**Part C - Government Inquires:**

Commissioners of Inquiry (1836). First Report of the Commissioners of Inquiry into the state of the Irish Fisheries, with the Minutes of Evidence and Appendix. Alexander Thom & Co., Dublin.

Fishery Commissioners (1865). Report of the Deep Sea and Coast Fishery Commissioners Ireland for 1864 to His Excellency the Lord Lieutenant of Ireland. Alexander Thom & Co., Dublin.

Inspectors of Irish Fisheries (1892). Report of the Inspector of Irish Fisheries on the Sea and Inland Fisheries of Ireland for 1891. Alexander Thom & Co., Dublin.

Report on Fish Decreases (1889). Report on Inquired held by the Inspectors of Irish Fisheries into an Alleged Decrease in the Supply of Fish off Certain Parts of the Coast of Ireland and the Alleged Effects Thereon by Trawling and Other Modes of Fishing to His Excellency the Lord Lieutenant of Ireland. Alexander Thom & Co., Dublin.

Report on Sea Fisheries (1866). Report from the Commissioners Appointed to Enquire into the Sea Fisheries of the United Kingdom with Appendix and Minutes of Evidence. Eyre and Spottiswoode, London.

Report on Trawl Net and Beam Trawl Fishing (1885). Report of the Commissioners Appointed to Inquire and Report upon … the use of the Trawl Net and Beam Trawl, with Minutes of Evidence and Appendix. Eyre and Spottiswoode, London.

Select Committee (1817). Report from Select Committee on South Devon Fisheries, with the Minutes of Evidence taken before them, 1817. Parliamentary Papers Online

Select Committee (1833). Report from the Select Committee on British Channel Fisheries, with Minutes of Evidence and Appendix, 1833. Parliamentary Papers Online

Select Committee (1893). Report from the Select Committee on Sea Fisheries, together with Proceedings of the Committee, Minutes of Evidence, Appendix and Index. Eyre and Spottiswoode, London

Select Committee (1904). Report from the Select Committee of the House of Lords on the Sea Fisheries Bill, Together with Proceedings of the Committee, Minutes of Evidence, and Appendix [and Index]. Wyman.

**Part D - Other reports:**

House of Commons. (1800). Report respecting the British herring fisheries.

Lee, R. M. (1911). Report on the Grimsby steam trawler records 1904–1907. Marine Biological Association.

Report on Sea Fisheries (1914). Annual report on sea fisheries for the year 1914 Part I and II. H.M. Stationery Office, London

Report on Sea Fisheries (1925). Report on Sea Fisheries for the Years 1919, 1920, 1921, 1922, and 1923. H.M. Stationery Office, London

Sea and Inland Fisheries of Ireland (1908). Report on the sea and inland fisheries of Ireland and appendix. The Stationery Office, Dublin.

Sea and Inland Fisheries of Ireland (1912). Report on the sea and inland fisheries of Ireland and appendix. The Stationery Office, Dublin.

Sea and Inland Fisheries of Ireland (1919). Report on the sea and inland fisheries of Ireland and appendix. The Stationery Office, Dublin.

**Part E - Statistical tables:**

Fishery Board for Scotland (1922). Sea fisheries statistical tables. H.M. Stationery Office, Edinburgh.

Sea Fisheries (1908). Sea fisheries statistical tables 1908*.* Fisheries – England & Wales. Ministry of Agriculture, Fisheries and Food. H.M. Stationery Office, London.

Sea Fisheries (1919). Sea fisheries statistical tables 1919*.* Fisheries – England & Wales. Ministry of Agriculture, Fisheries and Food. H.M. Stationery Office, London.

Sea Fisheries (1920). Sea fisheries statistical tables 1920*.* Fisheries – England & Wales. Ministry of Agriculture, Fisheries and Food. H.M. Stationery Office, London.

Sea Fisheries (1921). Sea fisheries statistical tables 1921*.* Fisheries – England & Wales. Ministry of Agriculture, Fisheries and Food. H.M. Stationery Office, London.

Sea Fisheries (1922). Sea fisheries statistical tables 1922*.* Fisheries – England & Wales. Ministry of Agriculture, Fisheries and Food. H.M. Stationery Office, London.

Sea Fisheries (1923). Sea fisheries statistical tables 1923*.* Fisheries – England & Wales. Ministry of Agriculture, Fisheries and Food. H.M. Stationery Office, London.

Sea Fisheries (1925). Sea fisheries statistical tables 1925*.* Fisheries – England & Wales. Ministry of Agriculture, Fisheries and Food. H.M. Stationery Office, London.

Sea Fisheries (1929). Sea fisheries statistical tables 1929*.* Fisheries – England & Wales. Ministry of Agriculture, Fisheries and Food. H.M. Stationery Office, London.

**Part F – Nautical charts:**

Close, A.W. (1914). Close’s fisherman’s chart of Scotland, north & western sheets.

Close, A.W. (1919). Close’s fisherman’s chart of Iceland.

Close, A.W. (1921a). Close’s fisherman’s chart of the English Channel.

Close, A.W. (1921b). Close’s fisherman’s chart of the North Sea.

Close, A.W. (1922). Close’s fisherman’s chart of Ireland, eastern & western sheets.

ICES (1925). Demersal landings by ICES rectangle, from ICES statistical charts.

Royal Navy (1916). Monthly fishing charts, compiled by the hydrographer for the Royal Navy, January–December.

Royal Navy (1924). Monthly fishing charts, compiled by the hydrographer for the Royal Navy, January–December.
